# Supplementary material
Source: PubMed Central journal article supplement (PMC7936472)
Supplement: NIHMS1675196-supplement-Supplemental_Methods__Tables_and_Figures.pdf [file NIHMS1675196-supplement-Supplemental_Methods__Tables_and_Figures.pdf]

## Supplemental Methods

### Physicochemical rules for identifying monoclonal antibodies with drug-like specificity

Yulei Zhang, Lina Wu, Priyanka Gupta, Alec A. Desai, Matthew D. Smith, Lilia A. Rabia, Seth D. Ludwig, Peter M. Tessier

**Individual chemical rules for identifying antibodies with low specificity.** The chemical rules were generated using threefold cross validation methods and were required to meet a number of constraints. First, the clinical-stage mAbs (137) were split into training (80%) and test (20%) sets in ten different ways using stratified sampling (Table S6). The training sets were further divided into three partitions (folds), and two partitions were used for training and one for validation. Individual rules were required to satisfy the following constraints: i) adjusted accuracy (herein simply referred to as accuracy) of preclinical antibodies (training set) >55%; ii) % mAbs flagged with high specificity (preclinical, training set) < % mAbs flagged with low specificity (preclinical, training set); iii) accuracy (clinical mAbs, training set) >55% in each fold (three constraints for each of the ten 80/20 splits); iv) difference between the accuracy of training (two folds) and validation (one fold) < 5% (three constraints for each of the ten 80/20 splits, clinical mAbs); v) % mAbs flagged with high specificity (defined by each individual assay) < % mAbs flagged with low specificity (defined by each individual assay; five constraints that were evaluated using the entire 80% of the clinical antibody training data for each of the ten 80/20 splits); vi) average validation accuracy for each of the ten 80/20 splits > 60% where the average validation accuracy is the average of the validation accuracy for all observed flag values within each 80/20 split; vii) average test accuracy for each of the ten 80/20 splits > 50% where the average test accuracy is the average of the test accuracies for all observed flag values within each 80/20 split. These constraints are summarized in Table S7. Finally, the rules were required to be observed in each of the ten 80/20 splits, although different values for the rules were allowed.

**Combined rules for enhancing the identification of mAbs with low specificity.** Sets of rules were generated by combining single rules together (up to six single rules per combined set were evaluated), as explained in the Results section. Each mAb was considered to have low specificity if flagged by four or five rules (as specified). Sets of rules in the first round of analysis were only accepted if they met several requirements: i) accuracy >60% (preclinical mAbs, training set); ii) % mAbs flagged with high specificity <10% (preclinical mAbs, training set); iii) accuracy (clinical mAbs, training set) >60% in each fold (three constraints for each of the ten 80/20 splits); iv)

difference between the accuracy of training (two folds) and validation (one fold) <10% (three constraints for each of the ten 80/20 splits, clinical mAbs); v) flag <5% clinical-stage mAbs with high specificity in training sets (as defined combination of five assays); vi) % accuracy (clinical mAbs, training set) >60% (defined by each individual assay; five constraints that were evaluated using the entire 80% of the clinical antibody training data for each of the ten 80/20 splits); and vii) % accuracy (clinical mAbs, training set) >60% (defined by combination of five assays; one constraint was evaluated using the entire 80% of the clinical antibody training data for each of the ten 80/20 splits). These constraints are summarized in Table S7. Finally, the combined rules (with the same values for each rule) were required to be observed in each of the ten 80/20 splits. The best sets of combined rules (Table S9) in the first round of analysis were identified as those with the lowest coefficients of variation for the average validation accuracy (ten 80/20 splits).

Next, mAbs that were not flagged as polyspecific in the first round of analysis (Set A in Table S9, <4 flags, 121 of 137 clinical mAbs and 375 of 424 preclinical mAbs) were evaluated in round 2 of analysis. First, single rules were generated using the same constraints as used in the first round of analysis. Next, combined sets of rules using the six rules in Set A (Table S9) and up to six additional rules were required to meet a number of constraints: i) accuracy >70% (preclinical mAbs, training set); ii) accuracy (clinical mAbs, training set) >75% in each fold (three constraints for each of the ten 80/20 splits); iii) difference between the accuracy of training (two folds) and validation (one fold) <10% (three constraints for each of the ten 80/20 splits, clinical mAbs); iv) flag <10% clinical-stage mAbs with high specificity in training sets (as defined by the combination of five assays); v) % accuracy (clinical mAbs, training set) >70% (defined by each individual assay; five constraints that were evaluated using the entire 80% of the clinical antibody training data for each of the ten 80/20 splits); and vi) % accuracy (clinical mAbs, training set) >75% (defined by combination of five assays; one constraint that was evaluated using the entire 80% of the clinical antibody training data for each of the ten 80/20 splits). These constraints are summarized in Table S7. Finally, the combined rules (with the same values for each rule) were required to be observed in each of the ten 80/20 splits. The best five sets of combined rules in concert with Set A (Table S9) were identified as those with the lowest coefficients of variation for the average validation accuracy (ten 80/20 splits; Table S12).

**Deep sequencing and data analysis.** The antibody libraries were evaluated using deep sequencing, as described in the Methods section. The V<sub>H</sub> region of the scFab gene was amplified via two-step PCR. The first step was performed using primers that were complementary to V<sub>H</sub> and added the Illumina adapter sequences and barcodes. The second reaction used the purified PCR

product from the first reaction and primers identical to the Illumina adapter sequences. The primers are summarized below:

| Primer Name | Sequence                                                              | Function                              |
|-------------|-----------------------------------------------------------------------|---------------------------------------|
| Key         | p5-i5-filler-plasmid_complement                                       |                                       |
| CSpr90      | AATGATACGGCGACCACCGAGATCTACACATCGTACGTCACCTCGCTACCGCTGGAGCTTCTTCTGGC  | Forward Primer for Sample Preparation |
| CSpr91      | AATGATACGGCGACCACCGAGATCTACACACTATCTGTCACCTCGCTACCGCTGGAGCTTCTTCTGGC  |                                       |
| CSpr92      | AATGATACGGCGACCACCGAGATCTACACTAGCGAGTTCACCTCGCTACCGCTGGAGCTTCTTCTGGC  |                                       |
| CSpr93      | AATGATACGGCGACCACCGAGATCTACACCTGCGTGTTCACCTCGCTACCGCTGGAGCTTCTTCTGGC  |                                       |
| CSpr94      | AATGATACGGCGACCACCGAGATCTACACTCATCGAGTTCACCTCGCTACCGCTGGAGCTTCTTCTGGC |                                       |
| CSpr95      | AATGATACGGCGACCACCGAGATCTACACCGTGAGTGTTCACCTCGCTACCGCTGGAGCTTCTTCTGGC |                                       |
| Key         | p7-i7-filler-plasmid_complement                                       |                                       |
| MSpr14      | CAAGCAGAAGACGGCATAACGAGATAACTTCTCGGTGACTGCCAATGGAAAAACAGAGGGCCC       | Reverse Primer for Sample Preparation |
| MSpr15      | CAAGCAGAAGACGGCATAACGAGATACTATGTCTGCTGACTGCCAATGGAAAAACAGAGGGCCC      |                                       |
| MSpr16      | CAAGCAGAAGACGGCATAACGAGATAGTAGCGTGTGACTGCCAATGGAAAAACAGAGGGCCC        |                                       |
| MSpr17      | CAAGCAGAAGACGGCATAACGAGATCAGTGAGTGTGACTGCCAATGGAAAAACAGAGGGCCC        |                                       |
| MSpr18      | CAAGCAGAAGACGGCATAACGAGATCGTACTCAGTGACTGCCAATGGAAAAACAGAGGGCCC        |                                       |
| MSpr19      | CAAGCAGAAGACGGCATAACGAGATCTACGCAGGTGACTGCCAATGGAAAAACAGAGGGCCC        |                                       |
| CSpr96      | TCACTCGCTACCGCTGGAGCTTCTTCTGGC                                        | Read1 Primer                          |
| MSpr12      | GGTGACTGCCAATGGAAAAACAGAGGGCCC                                        | Read2 Primer                          |
| MSpr13      | GGGCCCTCTGTTTTTCCATTGGCAGTCACC                                        | Index1 Primer                         |

The raw sequencing files from Illumina MiSeq (300 bp paired-end sequencing reaction) were merged together using BBMerge<sup>1</sup> with the qtrim parameter set to 15 and all other parameters set to default values. The resulting merged “.fastq” file was converted to a “.fasta” file and analyzed line by line. Sequences were translated with BioPython<sup>2</sup> if they were the correct size (378 bp) without any ‘N’ base calls. The frequency of each set of mutations (herein referred to as a mutational string) was counted if the first residue of the translation was the correct amino acid (‘A’) and there were no stop codons. If the first residue was incorrect or there was a stop codon, the translation of the reverse complement was checked. The frequency of each mutational string was determined and exported into a “.csv” file for calculation of the enrichment ratios.

## References

1. Bushnell, B.; Rood, J.; Singer, E. BBMerge - Accurate paired shotgun read merging via overlap. *Plos One* **2017**, *12*, (10).
2. Cock, P. J. A.; Antao, T.; Chang, J. T.; Chapman, B. A.; Cox, C. J.; Dalke, A.; Friedberg, I.; Hamelryck, T.; Kauff, F.; Wilczynski, B.; de Hoon, M. J. L. Biopython: freely available

Python tools for computational molecular biology and bioinformatics. *Bioinformatics* **2009**, 25, (11), 1422-1423.

**Table S5.** Maximum and minimum values for the observed counts of amino acids (weighted by their solvent accessibilities) and net charges (pH 7.4) of different regions within the variable domains of clinical-stage and preclinical mAbs in the training sets. Glycine is assumed to be fully exposed (SASA value of one). The net charges were calculated by assigning values of +1 for R and K, +0.1 for H, and -1 for D and E. The CDRs were defined using a combination of Chothia and Kabat numbering, and heavy chain CDR3 was defined to also include two additional N-terminal residues. It is expected that the performance of the rules generated in this study will be highest for mAbs that do not violate any of these limits.

| Max limits | A    | C    | D    | E    | F    | G  | H    | I    | K    | L    | M    |
|------------|------|------|------|------|------|----|------|------|------|------|------|
| H1         | 0.81 | 0    | 1.12 | 0.64 | 0.78 | 6  | 0.62 | 1.11 | 0.73 | 0.28 | 0.10 |
| H2         | 0.98 | 0    | 2.01 | 1.79 | 0.81 | 5  | 0.80 | 1.48 | 1.79 | 0.32 | 0.64 |
| H3         | 1.15 | 0.05 | 1.88 | 0.70 | 0.93 | 4  | 0.76 | 1.07 | 0.92 | 1.67 | 0.90 |
| H123       | 1.37 | 0.05 | 2.61 | 2.41 | 1.47 | 9  | 1.49 | 1.69 | 2.16 | 1.67 | 0.91 |
| L1         | 0.82 | 0.02 | 2.43 | 0.80 | 0.68 | 4  | 0.92 | 1.30 | 1.74 | 0.61 | 0.01 |
| L2         | 0.45 | 0    | 1.95 | 0.94 | 0.60 | 2  | 0.36 | 0.75 | 0.62 | 0.54 | 0.24 |
| L3         | 0.68 | 0.05 | 0.78 | 0.85 | 0.49 | 4  | 0.67 | 0.69 | 0.53 | 0.92 | 0.50 |
| L123       | 1.02 | 0.05 | 2.71 | 1.56 | 0.73 | 7  | 0.99 | 1.30 | 1.74 | 1.25 | 0.50 |
| CDR        | 1.95 | 0.05 | 4.22 | 3.04 | 1.47 | 12 | 1.80 | 1.79 | 2.89 | 1.78 | 0.91 |
| VH         | 3.39 | 0.05 | 3.63 | 4.34 | 1.47 | 18 | 1.49 | 2.18 | 4.73 | 2.65 | 1.02 |
| VL         | 2.98 | 0.06 | 4.54 | 4.31 | 1.22 | 17 | 1.26 | 1.59 | 4.05 | 2.67 | 0.50 |
| Fv         | 5.94 | 0.06 | 6.70 | 6.99 | 1.67 | 30 | 1.80 | 2.80 | 7.41 | 4.29 | 1.02 |
| framework  | 4.66 | 0.03 | 4.43 | 5.51 | 0.99 | 19 | 0.88 | 1.59 | 6.37 | 3.37 | 0.64 |

| Max limits | N    | P    | Q    | R    | S     | T     | V    | W    | Y    | # of residues | charge |
|------------|------|------|------|------|-------|-------|------|------|------|---------------|--------|
| H1         | 1.28 | 0.61 | 0.02 | 0.68 | 2.01  | 1.54  | 0.63 | 0.41 | 2.02 | 12            | 1.1    |
| H2         | 2.33 | 0.81 | 2.10 | 1.47 | 2.82  | 1.50  | 0.67 | 0.63 | 1.59 | 19            | 3      |
| H3         | 0.81 | 0.79 | 0.60 | 1.13 | 1.67  | 1.20  | 1.83 | 1.06 | 2.07 | 23            | 3.1    |
| H123       | 2.88 | 1.09 | 2.10 | 1.87 | 4.60  | 2.54  | 1.83 | 1.18 | 3.59 | 50            | 4.1    |
| L1         | 1.51 | 0.61 | 1.31 | 1.73 | 3.28  | 1.37  | 0.84 | 0.47 | 1.07 | 17            | 3.2    |
| L2         | 1.41 | 0.77 | 0.59 | 1.40 | 2.39  | 1.44  | 0.33 | 0.64 | 0.86 | 7             | 2.1    |
| L3         | 0.97 | 0.72 | 0.57 | 0.69 | 1.30  | 1.03  | 0.59 | 0.47 | 0.95 | 12            | 2.1    |
| L123       | 2.94 | 0.94 | 1.31 | 2.70 | 5.36  | 2.06  | 1.16 | 0.71 | 1.74 | 33            | 5.3    |
| CDR        | 3.84 | 1.68 | 3.12 | 2.74 | 8.22  | 3.58  | 1.96 | 1.34 | 4.05 | 79            | 7.1    |
| VH         | 4.11 | 3.47 | 4.68 | 3.84 | 11.50 | 7.26  | 2.82 | 1.47 | 3.80 | 130           | 7.1    |
| VL         | 3.28 | 3.67 | 3.32 | 4.16 | 12.61 | 5.22  | 2.56 | 0.71 | 2.09 | 113           | 5.2    |
| Fv         | 6.86 | 5.36 | 7.26 | 5.57 | 20.64 | 10.93 | 4.29 | 1.69 | 4.70 | 238           | 9.1    |
| framework  | 4.02 | 4.75 | 6.70 | 4.52 | 15.17 | 9.43  | 3.39 | 0.54 | 1.52 | 161           | 5.1    |

| Min limits | A    | C     | D    | E    | F    | G  | H | I    | K    | L    | M |
|------------|------|-------|------|------|------|----|---|------|------|------|---|
| H1         | 0    | 0     | 0    | 0    | 0    | 0  | 0 | 0    | 0    | 0    | 0 |
| H2         | 0    | 0     | 0    | 0    | 0    | 0  | 0 | 0    | 0    | 0    | 0 |
| H3         | 0    | 0     | 0    | 0    | 0    | 0  | 0 | 0    | 0    | 0    | 0 |
| H123       | 0    | 0     | 0    | 0    | 0    | 1  | 0 | 0    | 0    | 0    | 0 |
| L1         | 0    | 0     | 0    | 0    | 0    | 0  | 0 | 0    | 0    | 0    | 0 |
| L2         | 0    | 0     | 0    | 0    | 0    | 0  | 0 | 0    | 0    | 0    | 0 |
| L3         | 0    | 0     | 0    | 0    | 0    | 0  | 0 | 0    | 0    | 0    | 0 |
| L123       | 0    | 0     | 0    | 0    | 0    | 0  | 0 | 0    | 0    | 0    | 0 |
| CDR        | 0    | 0     | 0    | 0    | 0    | 1  | 0 | 0    | 0    | 0    | 0 |
| VH         | 0.35 | 6E-05 | 0.29 | 0.30 | 0    | 7  | 0 | 0    | 1.17 | 0.02 | 0 |
| VL         | 0.13 | 3E-05 | 0.03 | 0.60 | 0.01 | 7  | 0 | 0.01 | 0.76 | 0.22 | 0 |
| Fv         | 0.75 | 3E-04 | 1.15 | 1.54 | 0.04 | 17 | 0 | 0.08 | 2.79 | 0.31 | 0 |
| framework  | 0.63 | 3E-04 | 0.10 | 1.54 | 0.01 | 13 | 0 | 0.01 | 1.85 | 0.31 | 0 |

| Min limits | N | P    | Q     | R    | S     | T    | V    | W    | Y    | # of residues | charge |
|------------|---|------|-------|------|-------|------|------|------|------|---------------|--------|
| H1         | 0 | 0    | 0     | 0    | 0     | 0    | 0    | 0    | 0    | 10            | -2     |
| H2         | 0 | 0    | 0     | 0    | 0     | 0    | 0    | 0    | 0    | 16            | -3     |
| H3         | 0 | 0    | 0     | 0    | 0     | 0    | 0    | 0    | 0    | 5             | -4     |
| H123       | 0 | 0    | 0     | 0    | 0     | 0    | 0    | 0    | 0.19 | 32            | -4.9   |
| L1         | 0 | 0    | 0     | 0    | 0.25  | 0    | 0    | 0    | 0    | 10            | -4     |
| L2         | 0 | 0    | 0     | 0    | 0     | 0    | 0    | 0    | 0    | 7             | -2     |
| L3         | 0 | 0    | 0     | 0    | 0     | 0    | 0    | 0    | 0    | 7             | -2     |
| L123       | 0 | 0    | 0     | 0    | 0.32  | 0    | 0    | 0    | 0    | 24            | -5     |
| CDR        | 0 | 0    | 9E-04 | 0    | 0.82  | 0.21 | 0    | 0    | 0.31 | 60            | -7     |
| VH         | 0 | 0.53 | 1.17  | 0    | 5.26  | 1.25 | 0.27 | 0.01 | 0.29 | 112           | -4.9   |
| VL         | 0 | 0.88 | 0.74  | 0.52 | 6.19  | 1.99 | 0.10 | 0.00 | 0.22 | 104           | -5.9   |
| Fv         | 0 | 1.74 | 2.26  | 0.70 | 12.88 | 4.36 | 0.95 | 0.02 | 1.02 | 220           | -5     |
| framework  | 0 | 1.55 | 1.90  | 0.70 | 8.78  | 2.92 | 0.74 | 0.01 | 0.13 | 158           | -4     |

**Table S6.** Summary of segregation of clinical-stage mAbs into training and test sets. Clinical-stage mAbs (as numbered in Table S1) were divided into ten sets of 80% training mAbs and 20% test mAbs. For each 80/20 split, the training sets of mAbs (80%) was further divided into three groups for threefold cross validation.

| 80/20 Split                               | 1        |              |     |     | 2        |              |     |     | 3        |              |     |     | 4        |              |     |     |
|-------------------------------------------|----------|--------------|-----|-----|----------|--------------|-----|-----|----------|--------------|-----|-----|----------|--------------|-----|-----|
|                                           | Test set | Training set |     |     | Test set | Training set |     |     | Test set | Training set |     |     | Test set | Training set |     |     |
|                                           |          | A            | B   | C   |          | A            | B   | C   |          | A            | B   | C   |          | A            | B   | C   |
| Clinical-stage mAbs with high specificity | 16       | 1            | 2   | 4   | 7        | 1            | 9   | 3   | 1        | 5            | 6   | 2   | 4        | 3            | 5   | 1   |
|                                           | 20       | 3            | 8   | 5   | 11       | 2            | 12  | 6   | 4        | 7            | 11  | 3   | 10       | 6            | 7   | 2   |
|                                           | 34       | 10           | 11  | 6   | 20       | 4            | 24  | 8   | 9        | 8            | 12  | 15  | 13       | 15           | 8   | 9   |
|                                           | 35       | 14           | 12  | 7   | 23       | 5            | 26  | 10  | 10       | 13           | 16  | 25  | 14       | 17           | 11  | 21  |
|                                           | 38       | 18           | 17  | 9   | 25       | 14           | 28  | 13  | 14       | 17           | 19  | 26  | 16       | 18           | 12  | 23  |
|                                           | 42       | 31           | 19  | 13  | 27       | 15           | 29  | 16  | 24       | 18           | 38  | 28  | 28       | 20           | 19  | 24  |
|                                           | 45       | 37           | 25  | 15  | 30       | 18           | 32  | 17  | 35       | 20           | 39  | 29  | 41       | 22           | 27  | 29  |
|                                           | 51       | 48           | 27  | 21  | 49       | 31           | 34  | 19  | 43       | 21           | 40  | 30  | 48       | 25           | 30  | 31  |
|                                           | 52       | 49           | 29  | 22  | 50       | 33           | 35  | 21  | 57       | 22           | 44  | 33  | 54       | 26           | 32  | 33  |
|                                           | 54       | 50           | 33  | 23  | 51       | 37           | 41  | 22  | 58       | 23           | 47  | 36  | 62       | 40           | 34  | 36  |
|                                           | 55       | 56           | 36  | 24  | 58       | 38           | 42  | 36  | 60       | 27           | 49  | 37  | 64       | 42           | 35  | 37  |
|                                           | 61       | 59           | 39  | 26  | 59       | 40           | 44  | 39  | 63       | 31           | 50  | 41  | 77       | 46           | 38  | 39  |
|                                           | 68       | 63           | 40  | 28  | 62       | 48           | 45  | 43  | 64       | 32           | 51  | 42  | 78       | 50           | 44  | 43  |
|                                           | 70       | 65           | 41  | 30  | 64       | 52           | 54  | 46  | 65       | 34           | 54  | 48  | 80       | 52           | 45  | 51  |
|                                           | 71       | 67           | 44  | 32  | 78       | 53           | 63  | 47  | 73       | 45           | 56  | 66  | 88       | 57           | 47  | 53  |
|                                           | 76       | 69           | 47  | 43  | 82       | 55           | 69  | 57  | 80       | 46           | 61  | 69  | 89       | 59           | 49  | 55  |
|                                           | 80       | 72           | 53  | 46  | 89       | 56           | 71  | 60  | 84       | 52           | 62  | 70  | 93       | 66           | 60  | 56  |
|                                           | 82       | 73           | 57  | 60  | 90       | 61           | 72  | 66  | 86       | 53           | 67  | 76  | 94       | 67           | 65  | 58  |
|                                           | 94       | 74           | 58  | 62  | 95       | 65           | 75  | 68  | 93       | 55           | 68  | 78  | 95       | 69           | 76  | 61  |
|                                           |          | 77           | 75  | 64  |          | 67           | 76  | 73  |          | 59           | 71  | 79  |          | 73           | 81  | 63  |
|                                           | 78       | 79           | 66  |     | 70       | 79           | 74  |     | 81       | 72           | 82  |     | 75       | 82           | 68  |     |
|                                           | 84       | 81           | 86  |     | 80       | 83           | 77  |     | 85       | 74           | 83  |     | 79       | 83           | 70  |     |
|                                           | 88       | 83           | 87  |     | 84       | 87           | 81  |     | 87       | 75           | 88  |     | 84       | 87           | 71  |     |
|                                           | 89       | 85           | 90  |     | 88       | 91           | 85  |     | 90       | 77           | 89  |     | 86       | 90           | 72  |     |
|                                           | 91       | 93           | 96  |     | 94       | 92           | 86  |     | 94       | 95           | 91  |     | 92       | 91           | 74  |     |
|                                           | 92       | 95           | 97  |     | 96       | 97           | 93  |     | 96       | 97           | 92  |     | 97       | 96           | 85  |     |
| Clinical-stage mAbs with low specificity  | Test set | Training set |     |     |
|                                           |          | A            | B   | C   |          | A            | B   | C   |          | A            | B   | C   |          | A            | B   | C   |
|                                           | 98       | 106          | 101 | 99  | 99       | 101          | 107 | 98  | 99       | 100          | 103 | 98  | 105      | 98           | 100 | 99  |
|                                           | 100      | 108          | 103 | 105 | 103      | 106          | 109 | 100 | 101      | 102          | 106 | 104 | 113      | 102          | 104 | 101 |
|                                           | 102      | 109          | 107 | 112 | 104      | 108          | 119 | 102 | 108      | 107          | 111 | 105 | 115      | 109          | 116 | 103 |
|                                           | 104      | 110          | 114 | 113 | 114      | 111          | 121 | 105 | 109      | 112          | 113 | 110 | 117      | 110          | 119 | 106 |
|                                           | 115      | 111          | 118 | 123 | 118      | 112          | 124 | 110 | 115      | 116          | 114 | 118 | 123      | 111          | 120 | 107 |
|                                           | 120      | 116          | 122 | 125 | 130      | 116          | 125 | 113 | 130      | 117          | 119 | 122 | 126      | 112          | 122 | 108 |
|                                           | 121      | 117          | 127 | 129 | 131      | 117          | 132 | 115 | 132      | 123          | 120 | 125 | 128      | 114          | 127 | 121 |
|                                           | 124      | 119          | 128 | 131 | 134      | 120          | 133 | 122 | 133      | 124          | 121 | 126 | 129      | 118          | 131 | 124 |
|                                           |          | 126          | 132 | 133 |          | 123          | 135 | 126 |          | 127          | 128 | 131 |          | 130          | 132 | 125 |
|                                           |          | 130          | 134 | 135 |          | 127          | 136 | 129 |          | 129          | 136 | 134 |          | 135          | 133 | 137 |
|                                           |          | 137          | 136 |     |          | 128          | 137 |     |          | 135          | 137 |     |          | 136          | 134 |     |

| 80/20 Split                               | 5        |              |     |     | 6        |              |     |     | 7        |              |     |     | 8        |              |     |     |
|-------------------------------------------|----------|--------------|-----|-----|----------|--------------|-----|-----|----------|--------------|-----|-----|----------|--------------|-----|-----|
|                                           | Test set | Training set |     |     | Test set | Training set |     |     | Test set | Training set |     |     | Test set | Training set |     |     |
|                                           |          | A            | B   | C   |          | A            | B   | C   |          | A            | B   | C   |          | A            | B   | C   |
| Clinical-stage mAbs with high specificity | 3        | 6            | 2   | 1   | 12       | 1            | 3   | 2   | 3        | 6            | 2   | 1   | 3        | 5            | 1   | 2   |
|                                           | 9        | 8            | 4   | 7   | 21       | 5            | 4   | 16  | 9        | 8            | 4   | 7   | 4        | 8            | 23  | 6   |
|                                           | 23       | 10           | 5   | 11  | 23       | 6            | 7   | 18  | 23       | 10           | 5   | 11  | 7        | 12           | 24  | 9   |
|                                           | 24       | 12           | 13  | 14  | 25       | 8            | 10  | 19  | 24       | 12           | 13  | 14  | 10       | 13           | 28  | 11  |
|                                           | 26       | 16           | 19  | 15  | 34       | 9            | 13  | 20  | 26       | 16           | 19  | 15  | 16       | 14           | 29  | 15  |
|                                           | 36       | 28           | 20  | 17  | 41       | 11           | 14  | 26  | 36       | 28           | 20  | 17  | 18       | 19           | 30  | 17  |
|                                           | 39       | 29           | 25  | 18  | 44       | 15           | 17  | 31  | 39       | 29           | 25  | 18  | 26       | 22           | 36  | 20  |
|                                           | 45       | 30           | 27  | 21  | 45       | 22           | 29  | 33  | 45       | 30           | 27  | 21  | 31       | 27           | 41  | 21  |
|                                           | 48       | 34           | 31  | 22  | 59       | 24           | 30  | 35  | 48       | 34           | 31  | 22  | 32       | 34           | 45  | 25  |
|                                           | 51       | 42           | 32  | 37  | 60       | 27           | 36  | 40  | 51       | 42           | 32  | 37  | 40       | 37           | 57  | 33  |
|                                           | 54       | 44           | 33  | 40  | 62       | 28           | 37  | 42  | 54       | 44           | 33  | 40  | 42       | 38           | 61  | 35  |
|                                           | 57       | 47           | 35  | 41  | 63       | 32           | 46  | 48  | 57       | 47           | 35  | 41  | 46       | 43           | 63  | 39  |
|                                           | 61       | 49           | 38  | 43  | 65       | 38           | 47  | 54  | 49       | 38           | 43  | 61  | 52       | 44           | 65  | 48  |
|                                           | 66       | 52           | 53  | 46  | 66       | 39           | 49  | 55  | 52       | 53           | 46  | 66  | 58       | 47           | 66  | 50  |
|                                           | 71       | 55           | 58  | 50  | 69       | 43           | 51  | 61  | 55       | 58           | 50  | 71  | 59       | 49           | 69  | 53  |
|                                           | 78       | 59           | 64  | 56  | 75       | 50           | 52  | 64  | 59       | 64           | 56  | 78  | 62       | 51           | 75  | 60  |
|                                           | 91       | 62           | 65  | 60  | 81       | 56           | 53  | 67  | 62       | 65           | 60  | 91  | 64       | 54           | 76  | 67  |
|                                           | 94       | 69           | 67  | 63  | 82       | 57           | 58  | 74  | 69       | 67           | 63  | 94  | 68       | 55           | 77  | 70  |
|                                           | 96       | 76           | 72  | 68  | 92       | 68           | 70  | 76  | 76       | 72           | 68  | 96  | 80       | 56           | 81  | 72  |
|                                           |          | 77           | 75  | 70  |          | 71           | 86  | 78  |          | 77           | 75  | 70  |          | 71           | 83  | 78  |
|                                           | 80       | 82           | 73  |     | 72       | 87           | 83  |     | 80       | 82           | 73  |     | 73       | 87           | 79  |     |
|                                           | 81       | 84           | 74  |     | 73       | 88           | 84  |     | 81       | 84           | 74  |     | 74       | 88           | 82  |     |
|                                           | 85       | 87           | 79  |     | 77       | 89           | 85  |     | 85       | 87           | 79  |     | 86       | 89           | 84  |     |
|                                           | 86       | 88           | 83  |     | 79       | 93           | 90  |     | 86       | 88           | 83  |     | 91       | 95           | 85  |     |
|                                           | 89       | 90           | 92  |     | 80       | 94           | 96  |     | 89       | 90           | 92  |     | 92       | 96           | 90  |     |
|                                           | 95       | 93           | 97  |     | 91       | 95           | 97  |     | 95       | 93           | 97  |     | 93       | 97           | 94  |     |
| Clinical-stage mAbs with low specificity  | Test set | Training set |     |     |
|                                           | A        | B            | C   | A   | B        | C            | A   | B   | C        | A            | B   | C   | A        | B            | C   |     |
|                                           | 99       | 100          | 101 | 98  | 100      | 99           | 98  | 102 | 99       | 100          | 101 | 98  | 100      | 98           | 104 | 101 |
|                                           | 105      | 102          | 103 | 104 | 112      | 101          | 105 | 103 | 105      | 102          | 103 | 104 | 102      | 99           | 105 | 107 |
|                                           | 117      | 106          | 110 | 108 | 114      | 107          | 106 | 104 | 117      | 106          | 110 | 108 | 106      | 103          | 108 | 110 |
|                                           | 118      | 107          | 111 | 112 | 115      | 109          | 108 | 111 | 118      | 107          | 111 | 112 | 118      | 114          | 109 | 111 |
|                                           | 122      | 109          | 113 | 114 | 123      | 122          | 110 | 116 | 122      | 109          | 113 | 114 | 119      | 116          | 112 | 115 |
|                                           | 127      | 115          | 116 | 119 | 128      | 124          | 113 | 118 | 127      | 115          | 116 | 119 | 123      | 117          | 113 | 120 |
|                                           | 132      | 121          | 120 | 123 | 135      | 126          | 117 | 120 | 132      | 121          | 120 | 123 | 126      | 121          | 122 | 124 |
|                                           | 134      | 124          | 125 | 133 | 136      | 129          | 119 | 121 | 134      | 124          | 125 | 133 | 137      | 132          | 125 | 127 |
|                                           |          | 128          | 126 | 135 |          | 132          | 125 | 131 |          | 128          | 126 | 135 |          | 133          | 128 | 129 |
|                                           |          | 129          | 130 | 136 |          | 134          | 127 | 133 |          | 129          | 130 | 136 |          | 135          | 131 | 130 |
|                                           |          | 131          | 137 |     |          | 137          | 130 |     |          | 131          | 137 |     |          | 136          | 134 |     |



| 80/20 Split                               | 9        |              |     |     | 10       |              |     |     |
|-------------------------------------------|----------|--------------|-----|-----|----------|--------------|-----|-----|
|                                           | Test set | Training set |     |     | Test set | Training set |     |     |
|                                           |          | A            | B   | C   |          | A            | B   | C   |
| Clinical-stage mAbs with high specificity | 17       | 1            | 3   | 2   | 2        | 4            | 3   | 1   |
|                                           | 21       | 10           | 6   | 4   | 6        | 8            | 10  | 5   |
|                                           | 32       | 18           | 12  | 5   | 7        | 9            | 12  | 15  |
|                                           | 37       | 26           | 14  | 7   | 11       | 19           | 13  | 16  |
|                                           | 38       | 28           | 15  | 8   | 14       | 26           | 23  | 17  |
|                                           | 39       | 44           | 19  | 9   | 18       | 32           | 25  | 22  |
|                                           | 42       | 45           | 22  | 11  | 20       | 33           | 28  | 27  |
|                                           | 43       | 49           | 25  | 13  | 21       | 39           | 29  | 31  |
|                                           | 66       | 52           | 29  | 16  | 24       | 40           | 34  | 36  |
|                                           | 74       | 54           | 36  | 20  | 30       | 41           | 35  | 37  |
|                                           | 75       | 55           | 41  | 23  | 43       | 47           | 51  | 38  |
|                                           | 77       | 57           | 47  | 24  | 46       | 49           | 52  | 42  |
|                                           | 79       | 58           | 50  | 27  | 55       | 50           | 53  | 44  |
|                                           | 80       | 59           | 51  | 30  | 58       | 59           | 56  | 45  |
|                                           | 81       | 60           | 53  | 31  | 72       | 63           | 64  | 48  |
|                                           | 84       | 61           | 56  | 33  | 73       | 70           | 65  | 54  |
|                                           | 87       | 62           | 63  | 34  | 87       | 71           | 67  | 57  |
|                                           | 93       | 64           | 65  | 35  | 88       | 75           | 69  | 60  |
|                                           | 97       | 71           | 68  | 40  | 89       | 78           | 76  | 61  |
|                                           |          | 78           | 69  | 46  |          | 81           | 77  | 62  |
|                                           | 82       | 70           | 48  |     | 83       | 79           | 66  |     |
|                                           | 88       | 72           | 67  |     | 85       | 80           | 68  |     |
|                                           | 90       | 83           | 73  |     | 90       | 84           | 74  |     |
|                                           | 91       | 86           | 76  |     | 92       | 86           | 82  |     |
|                                           | 92       | 95           | 85  |     | 93       | 91           | 94  |     |
|                                           | 94       | 96           | 89  |     | 95       | 96           | 97  |     |
| Clinical-stage mAbs with low specificity  | Test set | Training set |     |     | Test set | Training set |     |     |
|                                           | A        | B            | C   | A   | B        | C            | C   |     |
|                                           | 100      | 99           | 98  | 101 | 102      | 100          | 98  | 99  |
|                                           | 105      | 107          | 102 | 103 | 105      | 106          | 101 | 103 |
|                                           | 118      | 108          | 104 | 111 | 108      | 107          | 111 | 104 |
|                                           | 127      | 110          | 106 | 113 | 115      | 109          | 122 | 112 |
|                                           | 129      | 112          | 109 | 115 | 124      | 110          | 123 | 113 |
|                                           | 132      | 117          | 114 | 116 | 125      | 116          | 126 | 114 |
|                                           | 135      | 123          | 119 | 121 | 128      | 118          | 127 | 117 |
|                                           | 137      | 124          | 120 | 122 | 135      | 119          | 129 | 131 |
|                                           |          | 126          | 125 | 134 |          | 120          | 130 | 132 |
|                                           |          | 131          | 128 | 136 |          | 121          | 134 | 133 |
|                                           |          | 133          | 130 |     |          | 137          | 136 |     |

**Table S7.** Summary of the constraints used to generate the single and combined sets of rules for flagging mAbs with low specificity.

| <b>Constraints for single rules</b> |                                                                                                                              | <b>1<sup>st</sup> round</b> | <b>2<sup>nd</sup> round</b> |
|-------------------------------------|------------------------------------------------------------------------------------------------------------------------------|-----------------------------|-----------------------------|
| <b>1</b>                            | Accuracy for preclinical mAbs (PSR assay)                                                                                    | >55%                        | >55%                        |
| <b>2</b>                            | % mAbs (preclinical, training set) flagged with low specificity - high specificity (PSR assay)                               | >0                          | >0                          |
| <b>3</b>                            | Accuracy of training set (clinical mAbs) in each fold                                                                        | >55%                        | >55%                        |
|                                     | * Three constraints for each of the ten 80/20 splits                                                                         |                             |                             |
| <b>4</b>                            | Accuracy of training set (clinical mAbs, two folds) - accuracy of validation set (one fold)                                  | <5%                         | <5%                         |
|                                     | * Three constraints for each of the ten 80/20 splits                                                                         |                             |                             |
| <b>5</b>                            | % mAbs (clinical, training set) flagged with low specificity - high specificity for each assay                               | >0                          | >0                          |
|                                     | * Five constraints for each individual assay (PSR, ELISA, BVP, AC-SINS, CSI)                                                 |                             |                             |
| <b>6</b>                            | Average validation accuracy for clinical mAbs                                                                                | >60%                        | >60%                        |
|                                     | * Average validation accuracy is evaluated based on the results for each flag value observed in each of the ten 80/20 splits |                             |                             |
| <b>7</b>                            | Average test accuracy for clinical mAbs                                                                                      | >50%                        | >50%                        |
|                                     | * Average test accuracy is evaluated based on the results for each flag value observed in each of the ten 80/20 splits       |                             |                             |

| <b>Constraints for combined rules</b> |                                                                                             | <b>1<sup>st</sup> round</b> | <b>2<sup>nd</sup> round</b> |
|---------------------------------------|---------------------------------------------------------------------------------------------|-----------------------------|-----------------------------|
| <b>1</b>                              | Accuracy for preclinical mAbs (PSR assay)                                                   | >60%                        | >70%                        |
| <b>2</b>                              | % mAbs (preclinical, training set) flagged with high specificity (PSR assay)                | <10%                        |                             |
| <b>3</b>                              | Accuracy of training set (clinical mAbs) in each fold                                       | >60%                        | >75%                        |
|                                       | * Three constraints for each of the ten 80/20 splits                                        |                             |                             |
| <b>4</b>                              | Accuracy of training set (clinical mAbs, two folds) - accuracy of validation set (one fold) | <10%                        | <10%                        |
|                                       | * Three constraints for each of the ten 80/20 splits                                        |                             |                             |
| <b>5</b>                              | % mAbs (clinical, training set) flagged with high specificity                               | <5%                         | <10%                        |
| <b>6</b>                              | Accuracy of training set (clinical mAbs) for each assay (PSR, ELISA, BVP, AC-SINS, CSI)     | >60%                        | >70%                        |
|                                       | * Five constraints for each individual assay (PSR, ELISA, BVP, AC-SINS, CSI)                |                             |                             |
| <b>7</b>                              | Accuracy for training set (clinical mAbs)                                                   | >60%                        | >75%                        |

**Table S9.** Summary of the best combined sets of rules generated in the first round of analysis that flag mAbs with low specificity. Five sets (A, B, C, D and E) of rules are reported. The rules are numbered as defined in Table S8. mAbs with low and high specificity are defined as in Tables S1 and S2.

| Set of flags | # of flags for mAbs with low specificity | Individual rule numbers for each set of flags |    |    |    |    |    | Flag values for corresponding individual rule of each set of flags |     |     |     |      |      |
|--------------|------------------------------------------|-----------------------------------------------|----|----|----|----|----|--------------------------------------------------------------------|-----|-----|-----|------|------|
| A            | ≥4                                       | 1                                             | 11 | 14 | 21 | 24 | 37 | 5.0                                                                | 4.0 | 4.6 | 4.7 | 12.2 | 4.9  |
| B            | ≥4                                       | 7                                             | 11 | 15 | 19 | 21 | 33 | 3.6                                                                | 4.0 | 4.2 | 3.0 | 4.8  | 17.8 |
| C            | ≥5                                       | 9                                             | 13 | 19 | 21 | 23 | 33 | 3.6                                                                | 7.5 | 3.0 | 4.8 | 2.1  | 17.8 |
| D            | ≥4                                       | 7                                             | 11 | 15 | 19 | 21 | 33 | 3.6                                                                | 4.0 | 4.2 | 3.0 | 4.8  | 16.7 |
| E            | ≥5                                       | 3                                             | 7  | 11 | 21 | 23 | 33 | 4.7                                                                | 3.6 | 4.0 | 4.8 | 2.1  | 17.8 |

| Clinical mAbs (non-specific and self-interactions, five assays) |                                         |                                        |                                 |                                      |                                 |                           |                         |                           |                                           |
|-----------------------------------------------------------------|-----------------------------------------|----------------------------------------|---------------------------------|--------------------------------------|---------------------------------|---------------------------|-------------------------|---------------------------|-------------------------------------------|
| Set of flags                                                    | % mAbs flagged (high specificity group) | % mAbs flagged (low specificity group) | Average validation accuracy (%) | Std. dev. of validation accuracy (%) | COV for validation accuracy (%) | Average test accuracy (%) | Test accuracy Stdev (%) | COV for test accuracy (%) | p-value for entire panel of clinical mAbs |
| A                                                               | 2.06                                    | 35.00                                  | 66.17                           | 0.87                                 | 1.32                            | 67.43                     | 3.68                    | 5.45                      | 3.78E-07                                  |
| B                                                               | 2.06                                    | 40.00                                  | 69.07                           | 0.93                                 | 1.35                            | 68.42                     | 3.74                    | 5.46                      | 2.15E-08                                  |
| C                                                               | 2.06                                    | 40.00                                  | 68.48                           | 0.96                                 | 1.41                            | 70.92                     | 3.91                    | 5.51                      | 2.15E-08                                  |
| D                                                               | 0.00                                    | 37.50                                  | 68.71                           | 1.06                                 | 1.55                            | 68.75                     | 4.17                    | 6.06                      | 1.04E-09                                  |
| E                                                               | 3.09                                    | 47.50                                  | 72.18                           | 1.22                                 | 1.69                            | 72.01                     | 4.98                    | 6.92                      | 1.31E-09                                  |

| Preclinical mAbs (non-specific interactions, PSR assay) |                                         |                                        |                       |                              |
|---------------------------------------------------------|-----------------------------------------|----------------------------------------|-----------------------|------------------------------|
| Set of flags                                            | % mAbs flagged (high specificity group) | % mAbs flagged (low specificity group) | Training accuracy (%) | p-value for preclinical mAbs |
| A                                                       | 9.32                                    | 44.44                                  | 67.56                 | 7.16E-06                     |
| B                                                       | 9.07                                    | 44.44                                  | 67.69                 | 5.61E-06                     |
| C                                                       | 5.04                                    | 33.33                                  | 64.15                 | 1.86E-05                     |
| D                                                       | 6.55                                    | 29.63                                  | 61.54                 | 5.54E-04                     |
| E                                                       | 8.56                                    | 40.74                                  | 66.09                 | 2.12E-05                     |

**Table S10.** Segregation of mAbs that pass the combined specificity rules in the first round of analysis into training and test sets. Clinical-stage mAbs (as numbered in Table S1) that pass the combined rules in Set A (<4 flags, 121 out of 137 mAbs; Table S8) were divided into ten sets of 80% training mAbs and 20% test mAbs. For each 80/20 split, the training sets of mAbs (80%) was further divided into three groups for threefold cross validation.

| 80/20 Split                               | 1        |              |     |     | 2        |              |     |     | 3        |              |     |     | 4        |              |     |     |
|-------------------------------------------|----------|--------------|-----|-----|----------|--------------|-----|-----|----------|--------------|-----|-----|----------|--------------|-----|-----|
|                                           | Test set | Training set |     |     | Test set | Training set |     |     | Test set | Training set |     |     | Test set | Training set |     |     |
|                                           |          | A            | B   | C   |          | A            | B   | C   |          | A            | B   | C   |          | A            | B   | C   |
| Clinical-stage mAbs with high specificity | 9        | 4            | 1   | 2   | 2        | 6            | 3   | 1   | 3        | 1            | 6   | 2   | 9        | 1            | 2   | 4   |
|                                           | 10       | 5            | 3   | 16  | 4        | 12           | 5   | 8   | 13       | 5            | 7   | 4   | 11       | 6            | 3   | 5   |
|                                           | 11       | 6            | 7   | 20  | 7        | 13           | 16  | 9   | 28       | 9            | 11  | 8   | 14       | 13           | 8   | 7   |
|                                           | 18       | 13           | 8   | 22  | 11       | 19           | 17  | 10  | 29       | 12           | 18  | 10  | 23       | 16           | 20  | 10  |
|                                           | 23       | 14           | 12  | 25  | 14       | 20           | 23  | 15  | 35       | 15           | 19  | 14  | 25       | 21           | 24  | 12  |
|                                           | 26       | 17           | 15  | 27  | 18       | 25           | 30  | 22  | 43       | 17           | 20  | 16  | 29       | 33           | 26  | 15  |
|                                           | 28       | 19           | 24  | 29  | 21       | 26           | 35  | 24  | 53       | 26           | 21  | 22  | 35       | 37           | 28  | 17  |
|                                           | 39       | 21           | 31  | 34  | 34       | 27           | 42  | 28  | 54       | 33           | 27  | 23  | 38       | 42           | 32  | 18  |
|                                           | 42       | 30           | 33  | 38  | 40       | 29           | 45  | 33  | 55       | 38           | 30  | 24  | 39       | 47           | 34  | 19  |
|                                           | 47       | 32           | 35  | 40  | 51       | 31           | 52  | 41  | 57       | 40           | 32  | 25  | 41       | 49           | 36  | 22  |
|                                           | 51       | 37           | 36  | 41  | 59       | 32           | 56  | 43  | 63       | 41           | 37  | 31  | 43       | 50           | 44  | 27  |
|                                           | 58       | 44           | 45  | 43  | 61       | 36           | 58  | 47  | 65       | 42           | 46  | 34  | 51       | 52           | 45  | 30  |
|                                           | 64       | 54           | 46  | 48  | 66       | 37           | 68  | 48  | 71       | 44           | 47  | 36  | 53       | 54           | 46  | 31  |
|                                           | 68       | 55           | 49  | 50  | 74       | 38           | 71  | 49  | 76       | 59           | 48  | 39  | 55       | 61           | 48  | 40  |
|                                           | 74       | 56           | 59  | 52  | 76       | 39           | 72  | 50  | 78       | 61           | 51  | 45  | 64       | 63           | 56  | 62  |
|                                           | 76       | 57           | 63  | 53  | 86       | 44           | 78  | 53  | 85       | 62           | 73  | 49  | 66       | 65           | 57  | 69  |
|                                           | 77       | 65           | 66  | 61  | 87       | 46           | 80  | 55  | 87       | 64           | 74  | 50  | 81       | 67           | 58  | 70  |
|                                           | 90       | 71           | 70  | 62  | 91       | 54           | 81  | 57  | 91       | 66           | 77  | 52  | 84       | 72           | 59  | 74  |
|                                           | 94       | 75           | 73  | 67  | 96       | 63           | 82  | 62  | 96       | 67           | 79  | 56  | 91       | 79           | 68  | 76  |
|                                           |          | 78           | 83  | 69  |          | 65           | 83  | 64  |          | 68           | 80  | 58  |          | 83           | 71  | 77  |
|                                           | 80       | 84           | 72  |     | 73       | 84           | 67  |     | 70       | 83           | 69  |     | 85       | 73           | 80  |     |
|                                           | 81       | 85           | 79  |     | 79       | 85           | 69  |     | 72       | 88           | 75  |     | 86       | 75           | 82  |     |
|                                           | 86       | 87           | 82  |     | 89       | 88           | 70  |     | 82       | 92           | 81  |     | 90       | 78           | 87  |     |
|                                           | 91       | 88           | 89  |     | 95       | 90           | 75  |     | 86       | 94           | 84  |     | 92       | 89           | 88  |     |
|                                           | 96       | 92           | 95  |     | 97       | 94           | 77  |     | 89       | 97           | 90  |     | 95       | 96           | 94  |     |
|                                           |          |              | 97  |     |          |              | 92  |     |          |              | 95  |     |          |              | 97  |     |
| Clinical-stage mAbs with low specificity  | Test set | Training set |     |     |
|                                           |          | A            | B   | C   |          | A            | B   | C   |          | A            | B   | C   |          | A            | B   | C   |
|                                           | 102      | 99           | 98  | 107 | 103      | 102          | 110 | 98  | 108      | 102          | 99  | 98  | 107      | 102          | 110 | 98  |
|                                           | 103      | 108          | 115 | 110 | 107      | 118          | 111 | 99  | 113      | 103          | 106 | 112 | 112      | 103          | 111 | 99  |
|                                           | 106      | 111          | 121 | 112 | 113      | 119          | 117 | 106 | 115      | 107          | 110 | 117 | 117      | 106          | 118 | 108 |
|                                           | 118      | 113          | 127 | 129 | 115      | 121          | 128 | 108 | 134      | 119          | 111 | 121 | 135      | 115          | 119 | 113 |
|                                           | 122      | 117          | 128 | 131 | 135      | 122          | 131 | 112 | 137      | 122          | 118 | 127 | 136      | 127          | 121 | 122 |
|                                           | 119      | 134          | 135 |     | 133      | 134          | 127 |     | 128      | 129          | 133 |     | 128      | 134          | 129 |     |
|                                           | 133      | 136          | 137 |     | 137      | 136          | 129 |     | 131      | 136          | 135 |     | 131      | 137          | 133 |     |

| 80/20 Split                               | 5        |              |     |     | 6        |              |     |     | 7        |              |     |     | 8        |              |     |     |
|-------------------------------------------|----------|--------------|-----|-----|----------|--------------|-----|-----|----------|--------------|-----|-----|----------|--------------|-----|-----|
|                                           | Test set | Training set |     |     | Test set | Training set |     |     | Test set | Training set |     |     | Test set | Training set |     |     |
|                                           |          | A            | B   | C   |          | A            | B   | C   |          | A            | B   | C   |          | A            | B   | C   |
| Clinical-stage mAbs with high specificity | 6        | 8            | 2   | 1   | 4        | 5            | 1   | 2   | 3        | 2            | 1   | 5   | 11       | 2            | 1   | 9   |
|                                           | 9        | 10           | 11  | 3   | 7        | 8            | 6   | 3   | 6        | 8            | 4   | 12  | 19       | 3            | 4   | 12  |
|                                           | 13       | 14           | 12  | 4   | 14       | 17           | 9   | 10  | 7        | 10           | 9   | 13  | 20       | 5            | 7   | 13  |
|                                           | 19       | 17           | 15  | 5   | 15       | 19           | 13  | 11  | 11       | 15           | 20  | 14  | 23       | 6            | 8   | 17  |
|                                           | 20       | 23           | 16  | 7   | 39       | 20           | 23  | 12  | 22       | 21           | 29  | 16  | 27       | 14           | 10  | 22  |
|                                           | 25       | 33           | 21  | 18  | 44       | 21           | 24  | 16  | 25       | 24           | 33  | 17  | 29       | 15           | 16  | 24  |
|                                           | 28       | 36           | 26  | 22  | 48       | 22           | 25  | 18  | 27       | 26           | 35  | 18  | 30       | 18           | 21  | 28  |
|                                           | 31       | 37           | 27  | 24  | 56       | 26           | 29  | 27  | 30       | 28           | 36  | 19  | 38       | 32           | 25  | 31  |
|                                           | 38       | 47           | 29  | 30  | 59       | 37           | 32  | 28  | 32       | 31           | 38  | 23  | 40       | 34           | 26  | 36  |
|                                           | 43       | 48           | 32  | 35  | 72       | 40           | 33  | 30  | 43       | 37           | 40  | 34  | 48       | 39           | 33  | 42  |
|                                           | 56       | 49           | 34  | 40  | 73       | 49           | 41  | 31  | 50       | 41           | 42  | 39  | 49       | 41           | 35  | 46  |
|                                           | 62       | 58           | 39  | 50  | 78       | 50           | 42  | 34  | 52       | 47           | 53  | 44  | 58       | 43           | 37  | 47  |
|                                           | 65       | 61           | 41  | 52  | 80       | 51           | 47  | 35  | 58       | 48           | 55  | 45  | 62       | 53           | 44  | 50  |
|                                           | 66       | 64           | 42  | 53  | 81       | 53           | 61  | 36  | 63       | 59           | 57  | 46  | 63       | 54           | 45  | 56  |
|                                           | 80       | 67           | 44  | 54  | 83       | 55           | 63  | 38  | 68       | 61           | 64  | 49  | 67       | 55           | 51  | 61  |
|                                           | 81       | 69           | 45  | 55  | 86       | 58           | 64  | 43  | 73       | 66           | 70  | 51  | 77       | 57           | 52  | 64  |
|                                           | 82       | 70           | 46  | 63  | 87       | 62           | 65  | 45  | 85       | 67           | 75  | 54  | 81       | 59           | 66  | 71  |
|                                           | 88       | 71           | 51  | 68  | 90       | 66           | 74  | 46  | 86       | 71           | 76  | 56  | 89       | 65           | 69  | 72  |
|                                           | 92       | 72           | 57  | 75  | 92       | 67           | 76  | 52  | 94       | 72           | 80  | 62  | 95       | 68           | 75  | 74  |
|                                           |          | 73           | 59  | 78  |          | 69           | 82  | 54  |          | 74           | 83  | 65  |          | 70           | 76  | 78  |
|                                           | 76       | 74           | 83  |     | 70       | 84           | 57  |     | 79       | 84           | 69  |     | 73       | 79           | 80  |     |
|                                           | 77       | 84           | 86  |     | 79       | 89           | 68  |     | 87       | 88           | 77  |     | 82       | 91           | 83  |     |
|                                           | 79       | 89           | 87  |     | 85       | 91           | 71  |     | 92       | 90           | 78  |     | 84       | 94           | 85  |     |
|                                           | 85       | 91           | 90  |     | 96       | 94           | 75  |     | 96       | 91           | 81  |     | 87       | 96           | 86  |     |
|                                           | 95       | 94           | 96  |     | 97       | 95           | 77  |     | 97       | 95           | 82  |     | 92       | 97           | 88  |     |
|                                           |          |              | 97  |     |          |              | 88  |     |          |              | 89  |     |          |              | 90  |     |
| Clinical-stage mAbs with low specificity  | Test set | Training set |     |     |
|                                           |          | A            | B   | C   |          | A            | B   | C   |          | A            | B   | C   |          | A            | B   | C   |
|                                           | 99       | 107          | 102 | 98  | 108      | 102          | 99  | 98  | 99       | 98           | 107 | 102 | 106      | 98           | 103 | 99  |
|                                           | 108      | 110          | 103 | 106 | 111      | 103          | 113 | 106 | 119      | 112          | 110 | 103 | 113      | 108          | 107 | 102 |
|                                           | 111      | 112          | 118 | 115 | 118      | 107          | 115 | 110 | 128      | 113          | 111 | 106 | 118      | 110          | 117 | 111 |
|                                           | 113      | 117          | 122 | 119 | 119      | 117          | 121 | 112 | 131      | 115          | 118 | 108 | 119      | 112          | 127 | 122 |
|                                           | 121      | 128          | 129 | 127 | 133      | 131          | 122 | 128 | 134      | 121          | 122 | 117 | 121      | 115          | 131 | 128 |
|                                           |          | 133          | 131 | 135 |          | 136          | 127 | 129 |          | 129          | 133 | 127 |          | 135          | 133 | 129 |
|                                           | 136      | 134          | 137 |     | 137      | 135          | 134 |     | 137      | 135          | 136 |     | 136      | 134          | 137 |     |

| 80/20 Split                               | 9        |              |     |     | 10       |              |     |     |
|-------------------------------------------|----------|--------------|-----|-----|----------|--------------|-----|-----|
|                                           | Test set | Training set |     |     | Test set | Training set |     |     |
|                                           |          | A            | B   | C   |          | A            | B   | C   |
| Clinical-stage mAbs with high specificity | 2        | 3            | 1   | 9   | 4        | 10           | 2   | 1   |
|                                           | 14       | 6            | 4   | 10  | 7        | 11           | 3   | 5   |
|                                           | 22       | 11           | 5   | 13  | 8        | 15           | 13  | 6   |
|                                           | 23       | 12           | 7   | 17  | 9        | 17           | 19  | 16  |
|                                           | 38       | 19           | 8   | 18  | 12       | 18           | 25  | 20  |
|                                           | 42       | 20           | 15  | 24  | 14       | 24           | 27  | 21  |
|                                           | 46       | 26           | 16  | 25  | 22       | 30           | 31  | 23  |
|                                           | 51       | 28           | 21  | 27  | 28       | 37           | 32  | 26  |
|                                           | 56       | 32           | 35  | 29  | 34       | 40           | 36  | 29  |
|                                           | 58       | 33           | 37  | 30  | 35       | 41           | 38  | 33  |
|                                           | 61       | 36           | 40  | 31  | 39       | 48           | 46  | 42  |
|                                           | 63       | 44           | 41  | 34  | 43       | 58           | 47  | 45  |
|                                           | 69       | 48           | 43  | 39  | 44       | 59           | 50  | 53  |
|                                           | 70       | 52           | 45  | 49  | 49       | 67           | 52  | 56  |
|                                           | 83       | 53           | 47  | 50  | 51       | 69           | 54  | 57  |
|                                           | 84       | 55           | 54  | 67  | 55       | 70           | 61  | 63  |
|                                           | 87       | 57           | 64  | 68  | 72       | 74           | 62  | 64  |
|                                           | 91       | 59           | 65  | 76  | 85       | 78           | 66  | 65  |
|                                           | 96       | 62           | 71  | 77  | 87       | 79           | 68  | 76  |
|                                           |          | 66           | 74  | 78  |          | 80           | 71  | 77  |
|                                           | 72       | 80           | 79  |     | 83       | 73           | 81  |     |
|                                           | 73       | 85           | 81  |     | 86       | 75           | 82  |     |
|                                           | 75       | 92           | 82  |     | 88       | 84           | 90  |     |
|                                           | 86       | 94           | 89  |     | 91       | 89           | 92  |     |
|                                           | 88       | 95           | 90  |     | 95       | 96           | 94  |     |
|                                           |          |              | 97  |     |          |              | 97  |     |
| Clinical-stage mAbs with low specificity  | Test set | Training set |     |     | Test set | Training set |     |     |
|                                           |          | A            | B   | C   |          | A            | B   | C   |
|                                           | 103      | 106          | 98  | 111 | 103      | 102          | 98  | 106 |
|                                           | 108      | 107          | 99  | 113 | 108      | 107          | 99  | 110 |
|                                           | 115      | 112          | 102 | 118 | 113      | 111          | 112 | 118 |
|                                           | 122      | 117          | 110 | 119 | 127      | 117          | 115 | 121 |
|                                           | 129      | 121          | 131 | 127 | 136      | 122          | 119 | 134 |
|                                           |          | 134          | 133 | 128 |          | 128          | 129 | 135 |
|                                           | 135      | 136          | 137 |     | 131      | 133          | 137 |     |

**Table S12.** Summary of the best combined sets of rules generated after the second round of analysis that identify mAbs with low specificity. Each of the reported sets of rules generated in the second round of analysis (F, G, H, I and J) were derived in combination with Set A from the first round of analysis (as defined in Table S8). The rules are numbered as defined in Table S11. mAbs with low and high specificity are defined as in Tables S1 and S2.

| Set of flags | # of flags for mAbs with low specificity | Individual rule numbers for each set of flags |    |    |    |    |    | Flag values for corresponding individual rule of each set of flags |      |      |     |      |      |
|--------------|------------------------------------------|-----------------------------------------------|----|----|----|----|----|--------------------------------------------------------------------|------|------|-----|------|------|
| F            | ≥8                                       | 11                                            | 18 | 31 | 32 | 36 | 39 | 23.2                                                               | 2.8  | 2.2  | 3.9 | 19.2 | 19.8 |
| G            | ≥8                                       | 11                                            | 18 | 31 | 32 | 36 | 42 | 23.2                                                               | 2.8  | 2.2  | 3.9 | 19.2 | 19.8 |
| H            | ≥8                                       | 10                                            | 21 | 30 | 31 | 36 | 41 | 25.5                                                               | 35.7 | 2.9  | 2.2 | 19.9 | 19.0 |
| I            | ≥8                                       | 10                                            | 18 | 21 | 31 | 36 | 41 | 25.5                                                               | 2.8  | 35.7 | 2.2 | 19.9 | 19.0 |
| J            | ≥8                                       | 6                                             | 21 | 31 | 32 | 36 | 37 | 24.3                                                               | 35.7 | 2.2  | 3.9 | 19.3 | 3.6  |

| Clinical mAbs (non-specific and self-interactions, five assays) |                                         |                                        |                                 |                                      |                                 |                           |                         |                           |                                                   |  |
|-----------------------------------------------------------------|-----------------------------------------|----------------------------------------|---------------------------------|--------------------------------------|---------------------------------|---------------------------|-------------------------|---------------------------|---------------------------------------------------|--|
| Set of flags                                                    | % mAbs flagged (high specificity group) | % mAbs flagged (low specificity group) | Average validation accuracy (%) | Std. dev. of validation accuracy (%) | COV for validation accuracy (%) | Average test accuracy (%) | Test accuracy Stdev (%) | COV for test accuracy (%) | <i>p</i> -value for entire panel of clinical mAbs |  |
| F                                                               | 8.25                                    | 77.50                                  | 83.20                           | 1.44                                 | 1.73                            | 90.16                     | 5.84                    | 6.48                      | 1.55E-15                                          |  |
| G                                                               | 8.25                                    | 77.50                                  | 83.20                           | 1.44                                 | 1.73                            | 90.16                     | 5.84                    | 6.48                      | 1.55E-15                                          |  |
| H                                                               | 7.22                                    | 77.50                                  | 83.59                           | 1.72                                 | 2.06                            | 91.22                     | 6.97                    | 7.64                      | 3.50E-16                                          |  |
| I                                                               | 7.22                                    | 77.50                                  | 83.52                           | 1.73                                 | 2.08                            | 91.48                     | 7.06                    | 7.72                      | 3.50E-16                                          |  |
| J                                                               | 7.22                                    | 77.50                                  | 83.71                           | 1.76                                 | 2.10                            | 90.69                     | 7.18                    | 7.91                      | 3.50E-16                                          |  |

| Preclinical mAbs (non-specific interactions, PSR assay) |                                         |                                        |                       |                                      |
|---------------------------------------------------------|-----------------------------------------|----------------------------------------|-----------------------|--------------------------------------|
| Set of flags                                            | % mAbs flagged (high specificity group) | % mAbs flagged (low specificity group) | Training accuracy (%) | <i>p</i> -value for preclinical mAbs |
| F                                                       | 16.22                                   | 55.00                                  | 70.27                 | 1.71E-05                             |
| G                                                       | 16.52                                   | 55.00                                  | 70.02                 | 2.27E-05                             |
| H                                                       | 19.47                                   | 60.00                                  | 70.11                 | 3.04E-05                             |
| I                                                       | 18.58                                   | 60.00                                  | 70.74                 | 1.56E-05                             |
| J                                                       | 17.70                                   | 55.00                                  | 70.99                 | 1.18E-05                             |

**Table S15.** Sets of four mutations in Fab sub-libraries of emibetuzumab that are most strongly correlated with reduced binding to polyspecificity reagents [PSR and ovalbumin (OVA)]. The libraries were designed and evaluated as described in Fig. 8. The  $p$ -values are for the Spearman's correlation coefficients ( $\rho$ ).

| CDR | H1 H2 H3 |    |    |    |    |    |    |     |      | # of clones |          | Spearman's correlation coefficient and $p$ -value |       |        |          |        |       |        |       | Avg $\rho$ |
|-----|----------|----|----|----|----|----|----|-----|------|-------------|----------|---------------------------------------------------|-------|--------|----------|--------|-------|--------|-------|------------|
|     | 33       | 50 | 54 | 55 | 56 | 95 | 97 | 102 | with | with        | Repeat 1 |                                                   |       |        | Repeat 2 |        |       |        |       |            |
|     | WT       | Y  | R  | R  | R  | G  | A  | W   | Y    | 4WT         | 4MT      | $\rho$                                            | $p$ - | $\rho$ | $p$ -    | $\rho$ | $p$ - | $\rho$ | $p$ - |            |
|     |          |    |    |    |    |    |    |     |      |             | (PSR)    | value                                             | (OVA) | value  | (PSR)    | value  | (OVA) | value  |       |            |
| 1   | F        |    | T  |    | D  |    |    | A   | 10   | 12          | 0.81     | 1E-05                                             | 0.83  | 6E-05  | 0.71     | 2E-03  | 0.83  | 1E-06  | 0.80  |            |
| 2   | F        |    | T  |    | D  |    |    | D   | 10   | 14          | 0.73     | 3E-04                                             | 0.87  | 4E-05  | 0.76     | 7E-05  | 0.78  | 7E-06  | 0.79  |            |
| 3   | V        |    | T  | G  | D  |    |    |     | 26   | 24          | 0.69     | 5E-05                                             | 0.85  | 9E-10  | 0.61     | 4E-05  | 0.76  | 1E-08  | 0.73  |            |
| 4   |          |    |    |    | D  | S  | L  | V   | 10   | 10          | 0.75     | 2E-04                                             | 0.69  | 2E-03  | 0.75     | 7E-04  | 0.69  | 7E-04  | 0.72  |            |
| 5   | V        |    |    |    | D  |    | L  | D   | 13   | 16          | 0.68     | 2E-04                                             | 0.70  | 4E-04  | 0.85     | 3E-08  | 0.65  | 2E-04  | 0.72  |            |
| 6   |          | K  |    |    | D  |    | L  | D   | 14   | 17          | 0.67     | 2E-04                                             | 0.73  | 7E-05  | 0.83     | 1E-08  | 0.63  | 3E-04  | 0.71  |            |
| 7   | V        |    | T  |    | D  |    |    | D   | 10   | 14          | 0.64     | 4E-03                                             | 0.75  | 3E-04  | 0.73     | 6E-04  | 0.72  | 2E-04  | 0.71  |            |
| 8   | F        |    |    | G  | D  |    | G  |     | 42   | 21          | 0.63     | 2E-06                                             | 0.81  | 3E-11  | 0.68     | 7E-08  | 0.64  | 3E-08  | 0.69  |            |
| 9   |          |    |    | G  | D  |    | L  | V   | 10   | 16          | 0.66     | 5E-04                                             | 0.72  | 4E-04  | 0.70     | 3E-04  | 0.68  | 2E-04  | 0.69  |            |
| 10  | F        |    |    | G  | D  |    | L  |     | 42   | 16          | 0.66     | 2E-06                                             | 0.75  | 1E-07  | 0.63     | 6E-07  | 0.69  | 1E-08  | 0.68  |            |
| 11  |          |    |    | G  | D  | S  | L  |     | 41   | 39          | 0.64     | 1E-07                                             | 0.69  | 1E-07  | 0.63     | 2E-08  | 0.73  | 3E-13  | 0.67  |            |
| 12  |          |    |    | G  | D  |    | S  | S   | 10   | 18          | 0.66     | 2E-04                                             | 0.62  | 1E-03  | 0.67     | 1E-04  | 0.67  | 9E-05  | 0.65  |            |
| 13  |          |    |    |    | D  | S  | S  | S   | 10   | 23          | 0.64     | 3E-04                                             | 0.66  | 3E-04  | 0.62     | 2E-04  | 0.63  | 8E-05  | 0.64  |            |



**Table S16.** Theoretical net charges and isoelectric points for the high specific clinical-stage antibodies in this study. The net charges (pH 7.4) were calculated by assigning values of +1 for R and K, +0.1 for H, and -1 for D and E. The CDRs were defined using a combination of Chothia and Kabat numbering, and heavy chain CDR3 was defined to also include two additional N-terminal residues. The values are averages with their corresponding standard deviations. These ranges (average  $\pm$  standard deviation) are defined only for the high specific mAbs (97 of 137 mAbs), while the ranges in Table S5 (minimum and maximum) are defined for both high and low specific mAbs (137 mAbs). Antibodies with charge and isoelectric properties outside of these ranges are not expected to be well described by the chemical rules. In particular, antibodies with more negatively charged CDRs or variable regions as well as lower isoelectric points than those for the high specific antibodies in this study are at risk for abnormal behavior, such as viscous behavior at high antibody concentrations.

| Antibody region | pI<br>avg $\pm$ stdev | net charge                  |
|-----------------|-----------------------|-----------------------------|
|                 |                       | (pH 7.4)<br>avg $\pm$ stdev |
| H1              |                       | -0.17 $\pm$ 0.54            |
| H2              |                       | 0.01 $\pm$ 1.32             |
| H3              |                       | -0.45 $\pm$ 1.07            |
| H123            |                       | -0.61 $\pm$ 1.71            |
| L1              |                       | 0.43 $\pm$ 1.16             |
| L2              |                       | 0.12 $\pm$ 0.97             |
| L3              |                       | 0.01 $\pm$ 0.79             |
| L123            |                       | 0.56 $\pm$ 1.90             |
| CDR             |                       | -0.05 $\pm$ 2.44            |
| VH              | 7.4 $\pm$ 1.4         | 0.75 $\pm$ 1.89             |
| VL              | 7.5 $\pm$ 1.4         | 0.79 $\pm$ 1.97             |
| Fv              | 7.7 $\pm$ 1.3         | 1.54 $\pm$ 2.48             |
| framework       | 7.9 $\pm$ 1.0         | 1.59 $\pm$ 1.52             |

**Table S17.** Number of chemical flags for the clinical-stage antibodies calculated using two different SASA machine learning models. The two models for calculating solvent-accessible surface areas were generated using a published method [Jain et al., *Bioinformatics*, 33, 3758-3766 (2017)]. Model A is used for calculating the chemical rules for the clinical-stage antibodies in Table S1, and Model B is used for calculating the chemical rules for preclinical antibodies in Table S2 and S13.

| Antibody      | Specificity | # of chemical flags from model A | # of chemical flags from model B | Antibody      | Specificity | # of chemical flags from model A | # of chemical flags from model B |
|---------------|-------------|----------------------------------|----------------------------------|---------------|-------------|----------------------------------|----------------------------------|
| abitzumab     | high        | 7                                | 7                                | mepolizumab   | high        | 4                                | 5                                |
| abrilumab     | high        | 6                                | 6                                | mogamulizumab | high        | 2                                | 2                                |
| adalimumab    | high        | 2                                | 2                                | motavizumab   | high        | 3                                | 3                                |
| alemtuzumab   | high        | 3                                | 3                                | muromonab     | high        | 8                                | 8                                |
| alirocumab    | high        | 1                                | 1                                | natalizumab   | high        | 7                                | 7                                |
| anifrolumab   | high        | 6                                | 6                                | neclumab      | high        | 6                                | 7                                |
| bapineuzumab  | high        | 5                                | 5                                | nimotuzumab   | high        | 4                                | 4                                |
| benralizumab  | high        | 7                                | 7                                | nivolumab     | high        | 3                                | 3                                |
| bevacizumab   | high        | 5                                | 5                                | obinutuzumab  | high        | 5                                | 5                                |
| brentuximab   | high        | 3                                | 3                                | ocrelizumab   | high        | 7                                | 7                                |
| brodalumab    | high        | 9                                | 9                                | ofatumumab    | high        | 6                                | 6                                |
| canakinumab   | high        | 7                                | 7                                | olaratumab    | high        | 9                                | 9                                |
| certolizumab  | high        | 6                                | 6                                | olokizumab    | high        | 3                                | 3                                |
| cetuximab     | high        | 3                                | 3                                | omalizumab    | high        | 6                                | 6                                |
| clazakizumab  | high        | 2                                | 1                                | onartuzumab   | high        | 3                                | 3                                |
| crenezumab    | high        | 4                                | 3                                | otelixizumab  | high        | 3                                | 3                                |
| dacetuzumab   | high        | 6                                | 6                                | otlertuzumab  | high        | 5                                | 5                                |
| daclizumab    | high        | 6                                | 6                                | palivizumab   | high        | 3                                | 3                                |
| daratumumab   | high        | 6                                | 6                                | panitumumab   | high        | 3                                | 4                                |
| dinutuximab   | high        | 7                                | 8                                | panobacumab   | high        | 5                                | 5                                |
| eculizumab    | high        | 2                                | 2                                | pembrolizumab | high        | 5                                | 5                                |
| efalizumab    | high        | 5                                | 6                                | pertuzumab    | high        | 7                                | 7                                |
| eldelumab     | high        | 5                                | 5                                | pinatuzumab   | high        | 6                                | 6                                |
| elotuzumab    | high        | 1                                | 1                                | polatuzumab   | high        | 5                                | 5                                |
| enokizumab    | high        | 8                                | 9                                | radretumab    | high        | 4                                | 4                                |
| epratuzumab   | high        | 4                                | 4                                | ramucirumab   | high        | 4                                | 4                                |
| evolocumab    | high        | 5                                | 6                                | ranibizumab   | high        | 6                                | 6                                |
| farletuzumab  | high        | 6                                | 6                                | reslizumab    | high        | 4                                | 4                                |
| fasinumab     | high        | 5                                | 6                                | rilatumumab   | high        | 7                                | 8                                |
| fezakinumab   | high        | 4                                | 4                                | rituximab     | high        | 6                                | 6                                |
| ficlatuzumab  | high        | 6                                | 6                                | romosozumab   | high        | 5                                | 5                                |
| fletikumab    | high        | 5                                | 5                                | sarilumab     | high        | 4                                | 4                                |
| fresolimumab  | high        | 5                                | 5                                | secukinumab   | high        | 6                                | 7                                |
| fulranumab    | high        | 5                                | 5                                | seribantumab  | high        | 4                                | 5                                |
| galiximab     | high        | 3                                | 2                                | sifalimumab   | high        | 7                                | 7                                |
| gemtuzumab    | high        | 2                                | 2                                | siltuximab    | high        | 6                                | 6                                |
| gevokizumab   | high        | 6                                | 6                                | tabalumab     | high        | 8                                | 8                                |
| girentuximab  | high        | 4                                | 4                                | tanezumab     | high        | 6                                | 6                                |
| glembatumumab | high        | 8                                | 8                                | tigatuzumab   | high        | 5                                | 4                                |
| golimumab     | high        | 7                                | 7                                | tildrakizumab | high        | 6                                | 6                                |
| ibalizumab    | high        | 4                                | 4                                | tocilizumab   | high        | 5                                | 5                                |
| ipilimumab    | high        | 5                                | 4                                | tovetumab     | high        | 9                                | 9                                |
| lampalizumab  | high        | 2                                | 2                                | tralokinumab  | high        | 2                                | 2                                |
| lebrikizumab  | high        | 3                                | 3                                | trastuzumab   | high        | 3                                | 3                                |
| lintuzumab    | high        | 6                                | 6                                | tremelimumab  | high        | 11                               | 11                               |
| lumiliximab   | high        | 3                                | 3                                | vedolizumab   | high        | 7                                | 7                                |
| matuzumab     | high        | 5                                | 5                                | veltuzumab    | high        | 7                                | 7                                |
| mavrilimumab  | high        | 2                                | 2                                | zalutumumab   | high        | 6                                | 6                                |

| <b>Antibody</b> | <b>Specificity</b> | <b># of chemical flags from model A</b> | <b># of chemical flags from model B</b> |
|-----------------|--------------------|-----------------------------------------|-----------------------------------------|
| zanolimumab     | high               | 5                                       | 5                                       |
| atezolizumab    | low                | 9                                       | 9                                       |
| basiliximab     | low                | 9                                       | 9                                       |
| bavituximab     | low                | 10                                      | 10                                      |
| belimumab       | low                | 8                                       | 9                                       |
| bimagrumab      | low                | 9                                       | 9                                       |
| blosozumab      | low                | 5                                       | 5                                       |
| bococizumab     | low                | 11                                      | 11                                      |
| briakinumab     | low                | 9                                       | 8                                       |
| carlumab        | low                | 6                                       | 6                                       |
| cixutumumab     | low                | 8                                       | 8                                       |
| codrituzumab    | low                | 7                                       | 7                                       |
| dalotuzumab     | low                | 8                                       | 8                                       |
| denosumab       | low                | 6                                       | 7                                       |
| drozitumab      | low                | 4                                       | 4                                       |
| duligotuzumab   | low                | 6                                       | 6                                       |
| dupilumab       | low                | 8                                       | 7                                       |
| emibetuzumab    | low                | 8                                       | 8                                       |
| etrolizumab     | low                | 8                                       | 8                                       |
| figitumumab     | low                | 8                                       | 8                                       |
| foralumab       | low                | 9                                       | 9                                       |
| ganitumab       | low                | 8                                       | 8                                       |
| gantenerumab    | low                | 8                                       | 8                                       |
| guselkumab      | low                | 8                                       | 8                                       |
| imgatuzumab     | low                | 8                                       | 8                                       |
| infliximab      | low                | 7                                       | 7                                       |
| inotuzumab      | low                | 10                                      | 10                                      |
| ixekizumab      | low                | 9                                       | 9                                       |
| lenzilumab      | low                | 9                                       | 9                                       |
| lirilumab       | low                | 10                                      | 10                                      |
| ozanezumab      | low                | 8                                       | 8                                       |
| parsatuzumab    | low                | 8                                       | 8                                       |
| patritumab      | low                | 9                                       | 9                                       |
| ponezumab       | low                | 8                                       | 8                                       |
| robatumumab     | low                | 7                                       | 7                                       |
| simtuzumab      | low                | 10                                      | 10                                      |
| sirukumab       | low                | 8                                       | 8                                       |
| teplizumab      | low                | 8                                       | 8                                       |
| urelumab        | low                | 9                                       | 9                                       |
| ustekinumab     | low                | 6                                       | 6                                       |
| visilizumab     | low                | 9                                       | 9                                       |

|                  | H1  | H2  |     |     |     | H3  |     |     |
|------------------|-----|-----|-----|-----|-----|-----|-----|-----|
|                  | 33  | 50  | 54  | 55  | 56  | 95  | 97  | 102 |
| Degenerate codon | KHY | RVR | RVR | RVR | RVY | KHY | KBG | KHY |
| WT               | Y   | R   | R   | R   | G   | A   | W   | Y   |
| 1                | F   | K   | K   | K   | A   | F   | V   | F   |
| 2                | V   | A   | A   | A   | D   | Y   | L   | V   |
| 3                | A   | G   | G   | G   | N   | V   | A   | A   |
| 4                | D   | E   | E   | E   | S   | D   | G   | D   |
| 5                | S   | T   | T   | T   | T   | S   | S   | S   |

**Figure S1.** Design of a mutant  $V_H$  library for single-chain Fab fragments of emibetuzumab aimed at reducing the number of chemical flags. Eight sites in the CDRs flagged by the maximum chemical rules in Fig. 4 were mutated using degenerate codons that are designed to sample the wild-type residue and five mutations that reduce the number of chemical flags.

## Biophysical Assay: PSR

Clinical-stage mAbs: ■  $\leq 0.27$  ■  $> 0.27$

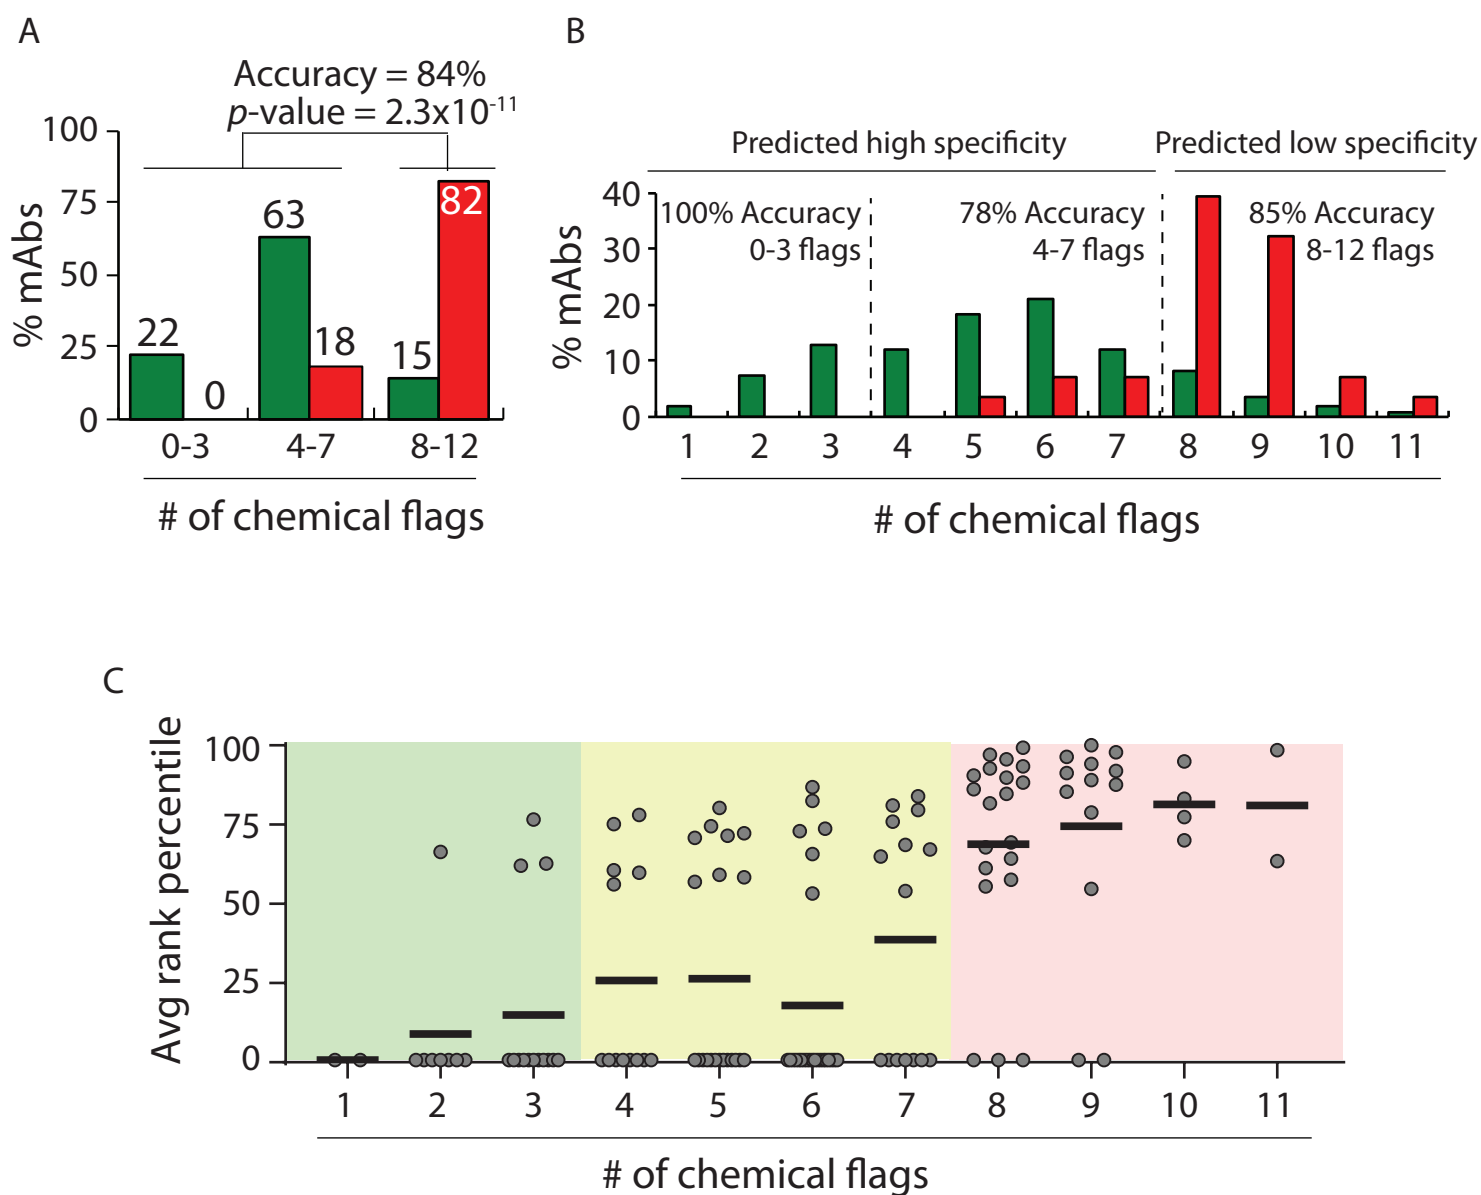

**Figure S2.** Performance of combined chemical rules for identifying clinical-stage mAbs with high levels of non-specific interactions detected using the PSR assay. (A, B) Evaluation of the percentage of mAbs with high and low specificity flagged by the combined set of chemical rules for (A) grouped numbers of chemical flags and (B) individual numbers of chemical flags. (C) Comparison of the rank for clinical-stage mAbs based on PSR measurements and the corresponding number of chemical flags. In (A) and (B), the  $p$ -values were calculated using a 2x2 contingency table (Fisher's exact test). In (C), three regions are shown, one with predicted high specificity (0-3 chemical flags), a second one with intermediate specificity (4-7 chemical flags), and a third one with low specificity (8-12 chemical flags).

# Biophysical Assay: AC-SINS

Clinical-stage mAbs: ■  $\leq 11.8$  nm ■  $> 11.8$  nm

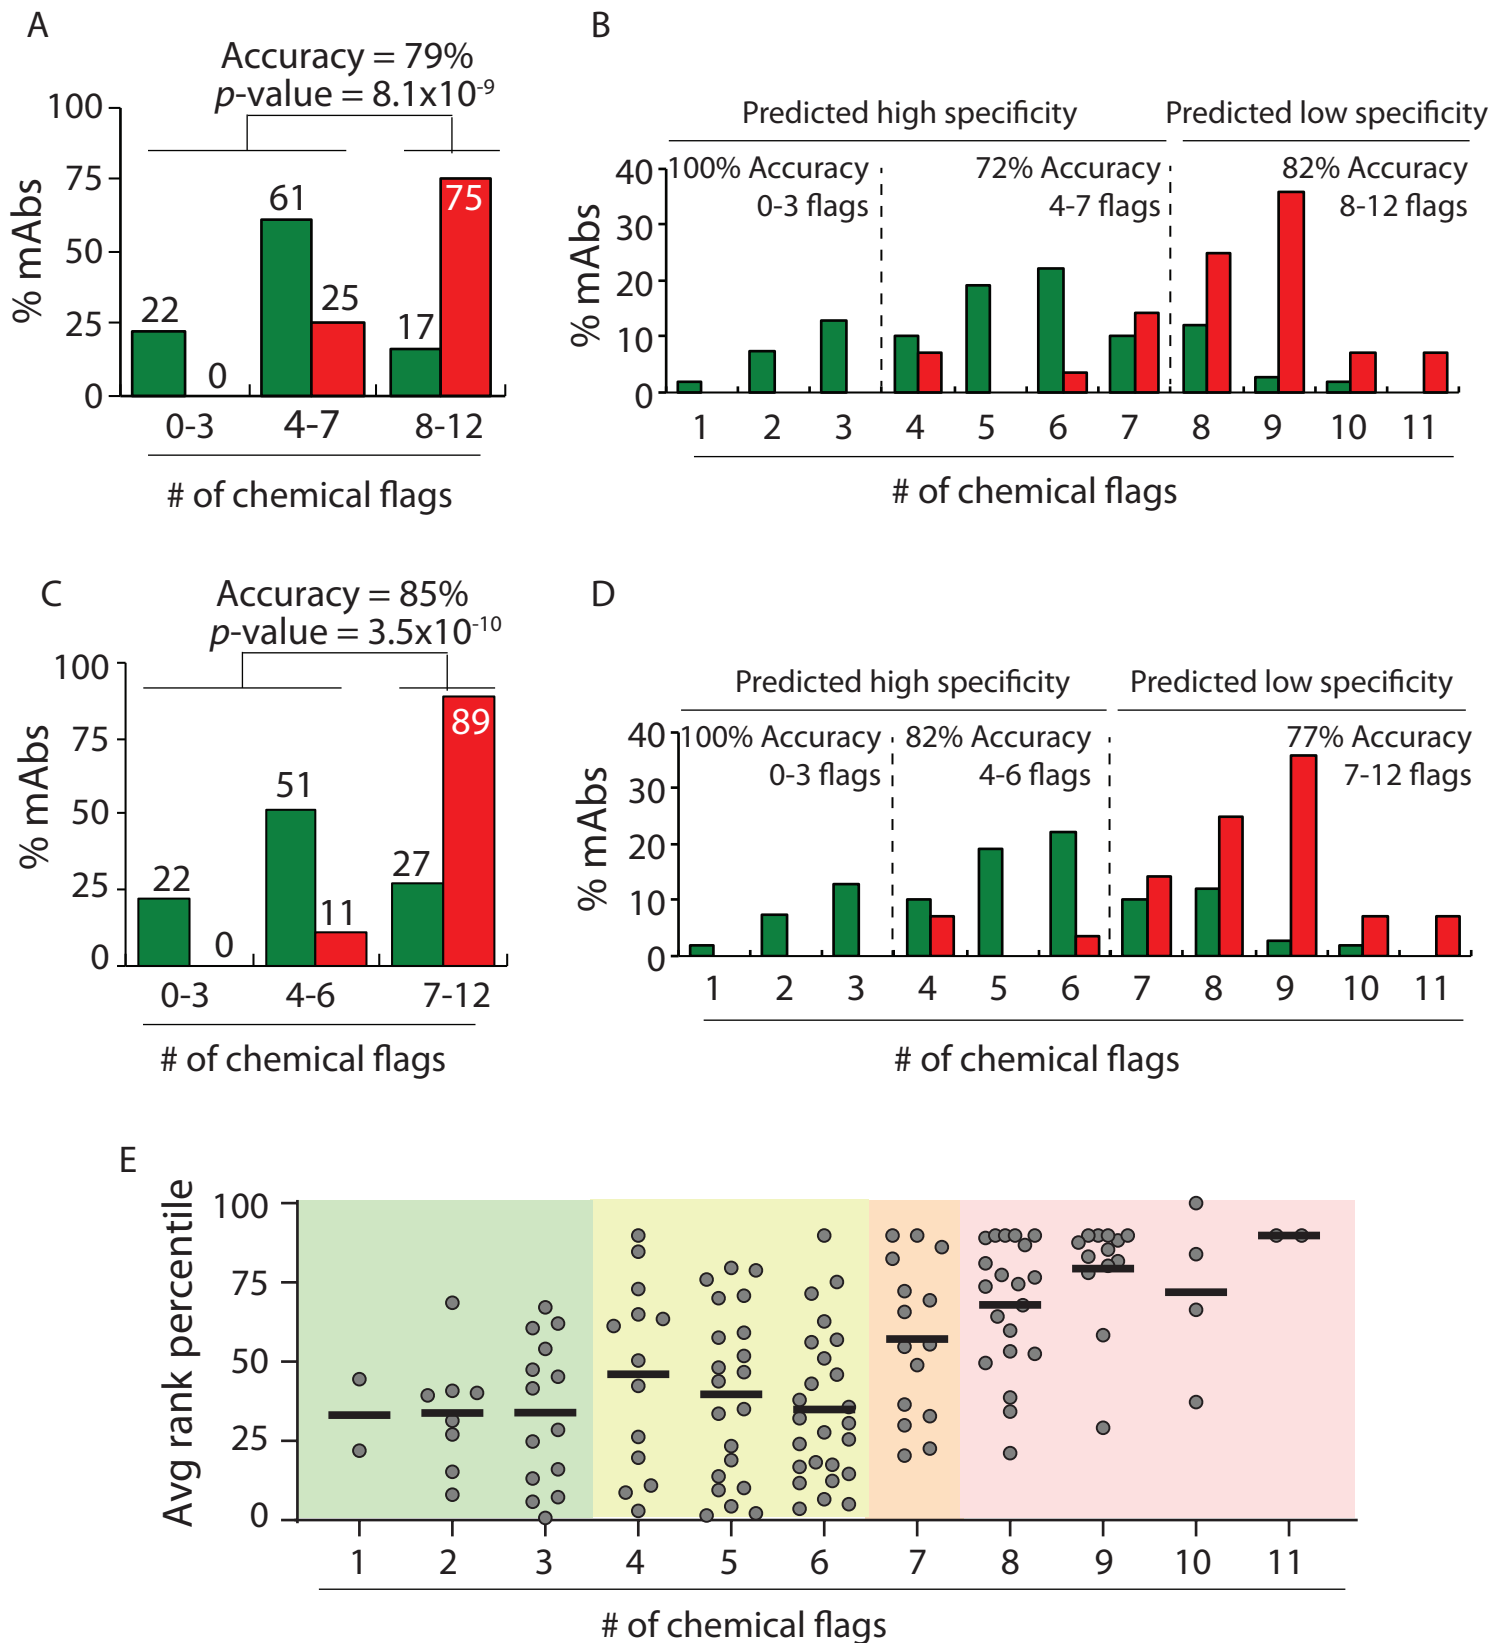

**Figure S3.** Performance of combined chemical rules for identifying clinical-stage mAbs with high levels of self-interactions detected using the AC-SINS assay. (A-D) Evaluation of the percentage of mAbs with high and low specificity flagged by the combined set of chemical rules for (A, C) grouped numbers of chemical flags and (B, D) individual numbers of chemical flags. (E) Comparison of the rank for clinical-stage mAbs based on AC-SINS measurements and the corresponding number of chemical flags. In (A-D), the  $p$ -values were calculated using a 2x2 contingency table (Fisher's exact test). In (E), three regions are shown, one with predicted high specificity (0-3 chemical flags), a second one with intermediate specificity (4-6 or 4-7 flags chemical flags), and a third one with low specificity (7-12 or 8-12 chemical flags).

# Biophysical Assay: CSI

Clinical-stage mAbs: ■  $\leq 0.01$  response unit ■  $> 0.01$  response unit

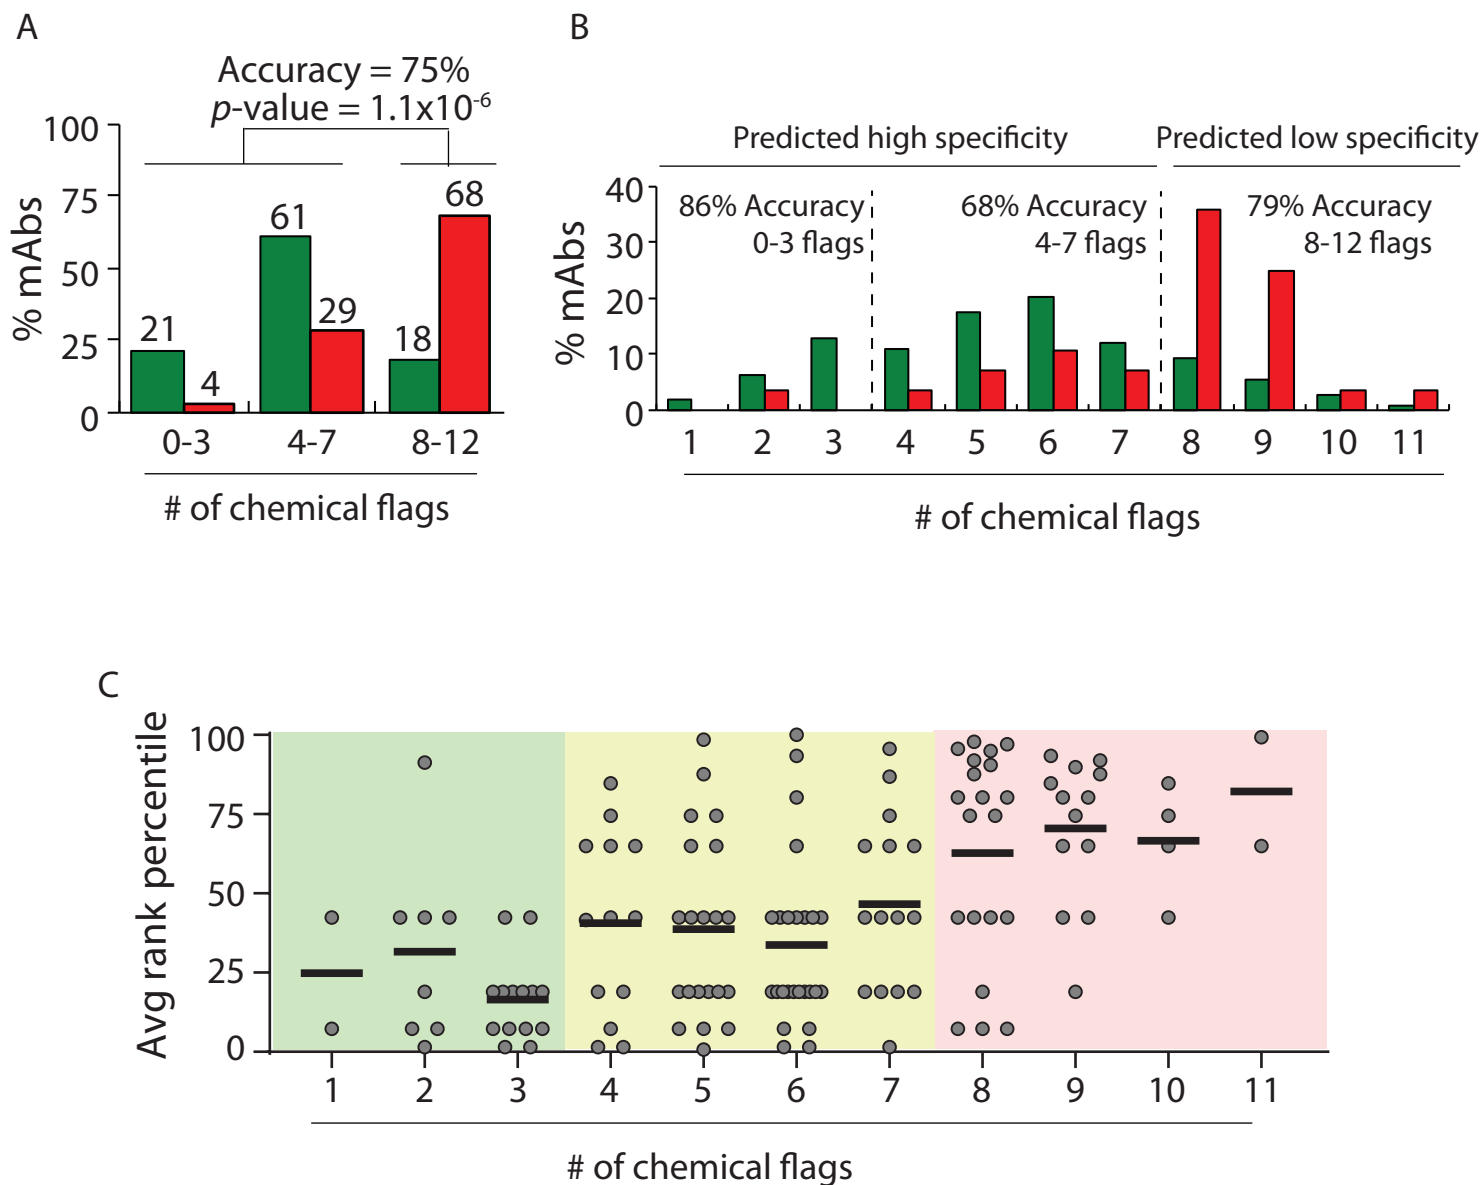

**Figure S4.** Performance of combined chemical rules for identifying clinical-stage mAbs with high levels of self-interactions detected using the CSI assay. (A, B) Evaluation of the percentage of mAbs with high and low specificity flagged by the combined set of chemical rules for (A) grouped numbers of chemical flags and (B) individual numbers of chemical flags. (C) Comparison of the rank for clinical-stage mAbs based on CSI measurements and the corresponding number of chemical flags. In (A) and (B), the  $p$ -values were calculated using a 2x2 contingency table (Fisher's exact test). In (C), three regions are shown, one with predicted high specificity (0-3 chemical flags), a second one with intermediate specificity (4-7 chemical flags), and a third one with low specificity (8-12 chemical flags).

# Biophysical Assay: ELISA

Clinical-stage mAbs: ■  $\leq 1.9$  signal/background ■  $> 1.9$  signal/background

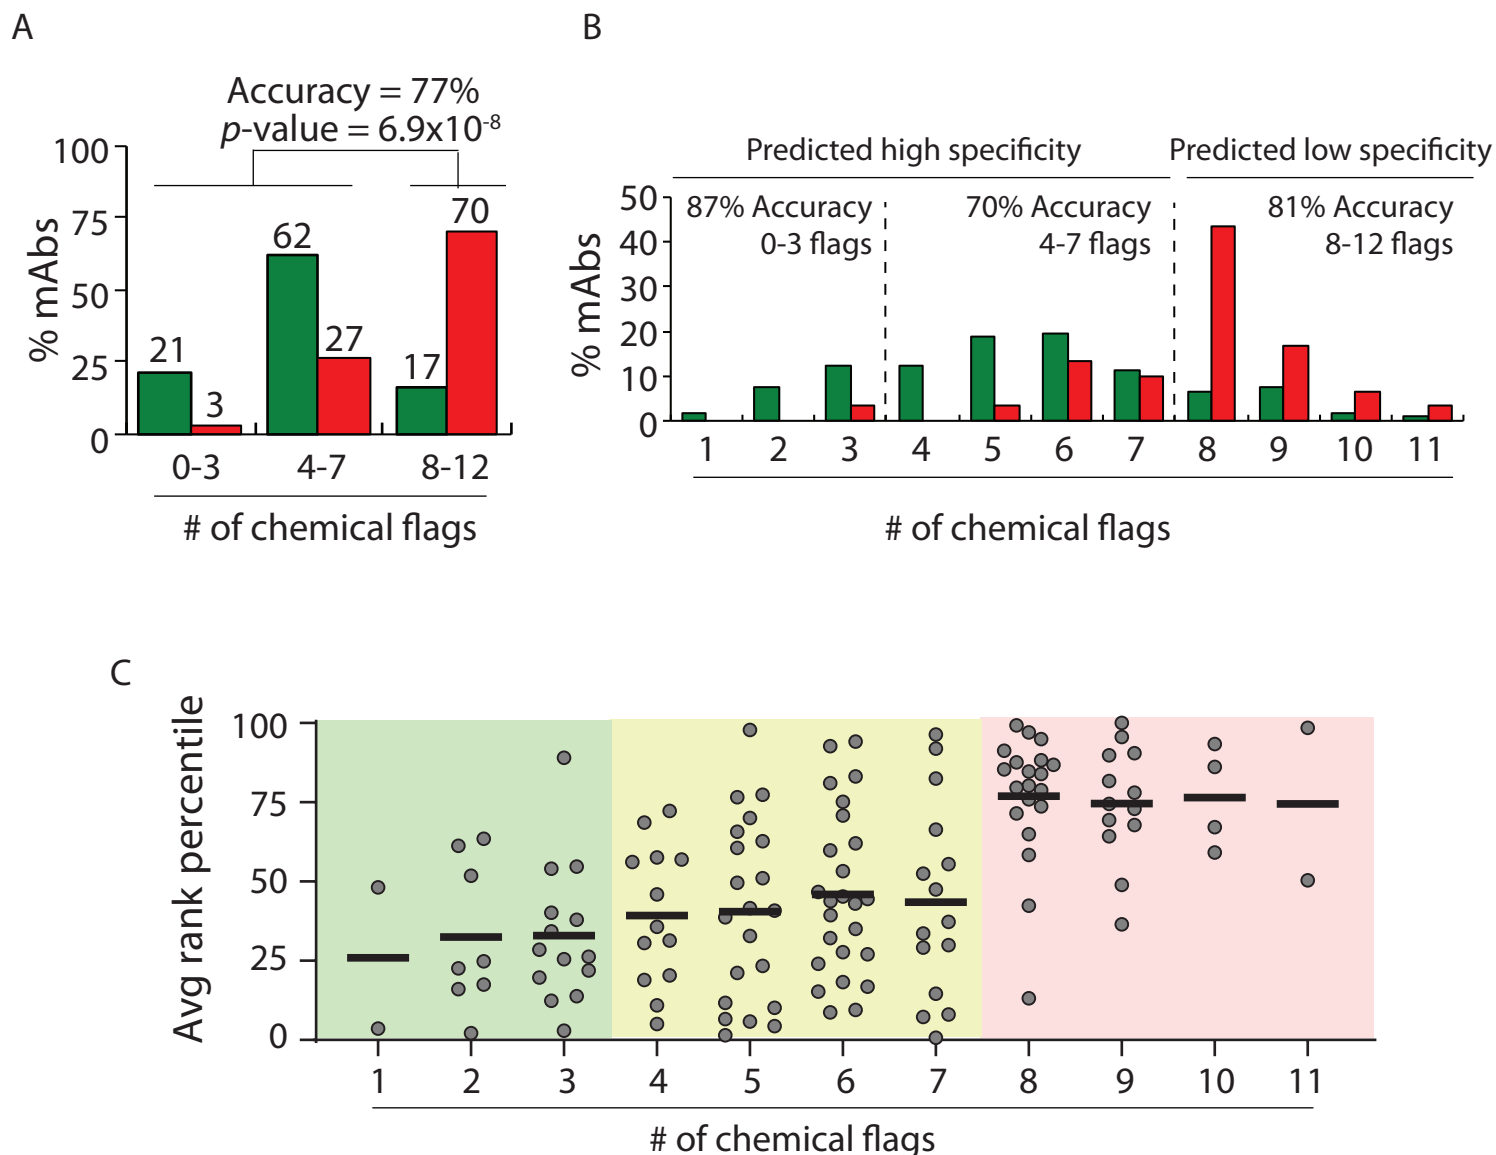

**Figure S5.** Performance of combined chemical rules for identifying clinical-stage mAbs with high levels of non-specific interactions detected using the ELISA non-specific binding assay. (A, B) Evaluation of the percentage of mAbs with high and low specificity flagged by the combined set of chemical rules for (A) grouped numbers of chemical flags and (B) individual numbers of chemical flags. (C) Comparison of the rank for clinical-stage mAbs based on ELISA measurements and the corresponding number of chemical flags. In (A) and (B), the  $p$ -values were calculated using a 2x2 contingency table (Fisher's exact test). In (C), three regions are shown, one with predicted high specificity (0-3 chemical flags), a second one with intermediate specificity (4-7 chemical flags), and a third one with low specificity (8-12 chemical flags).



# Biophysical Assay: BVP

Clinical-stage mAbs: ■  $\leq 4.3$  signal/background ■  $> 4.3$  signal/background

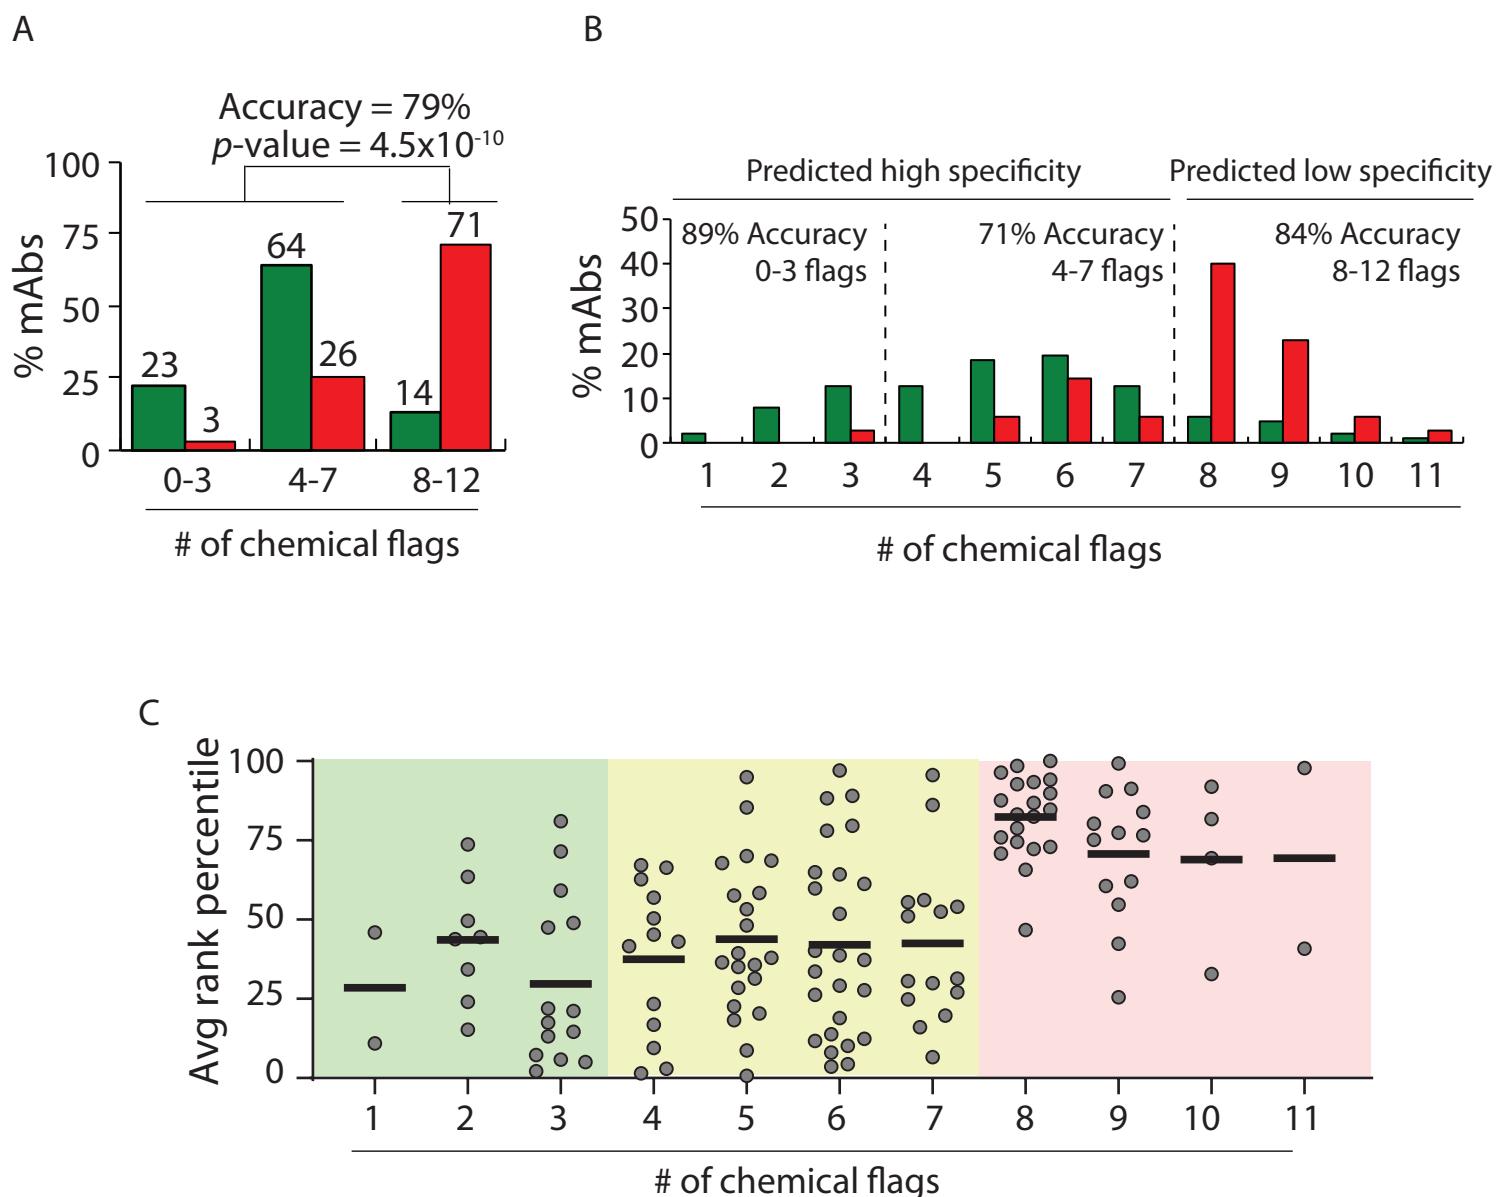

**Figure S6.** Performance of combined chemical rules for identifying clinical-stage mAbs with high levels of non-specific interactions detected using the BVP assay. (A, B) Evaluation of the percentage of mAbs with high and low specificity flagged by the combined set of chemical rules for (A) grouped numbers of chemical flags and (B) individual numbers of chemical flags. (C) Comparison of the rank for clinical-stage mAbs based on BVP measurements and the corresponding number of chemical flags. In (A) and (B), the  $p$ -values were calculated using a 2x2 contingency table (Fisher's exact test). In (C), three regions are shown, one with predicted high specificity (0-3 chemical flags), a second one with intermediate specificity (4-7 chemical flags), and a third one with low specificity (8-12 chemical flags).

## Biophysical Assay: PSR

Preclinical mAbs: ■  $\leq 0.27$  ■  $> 0.27$

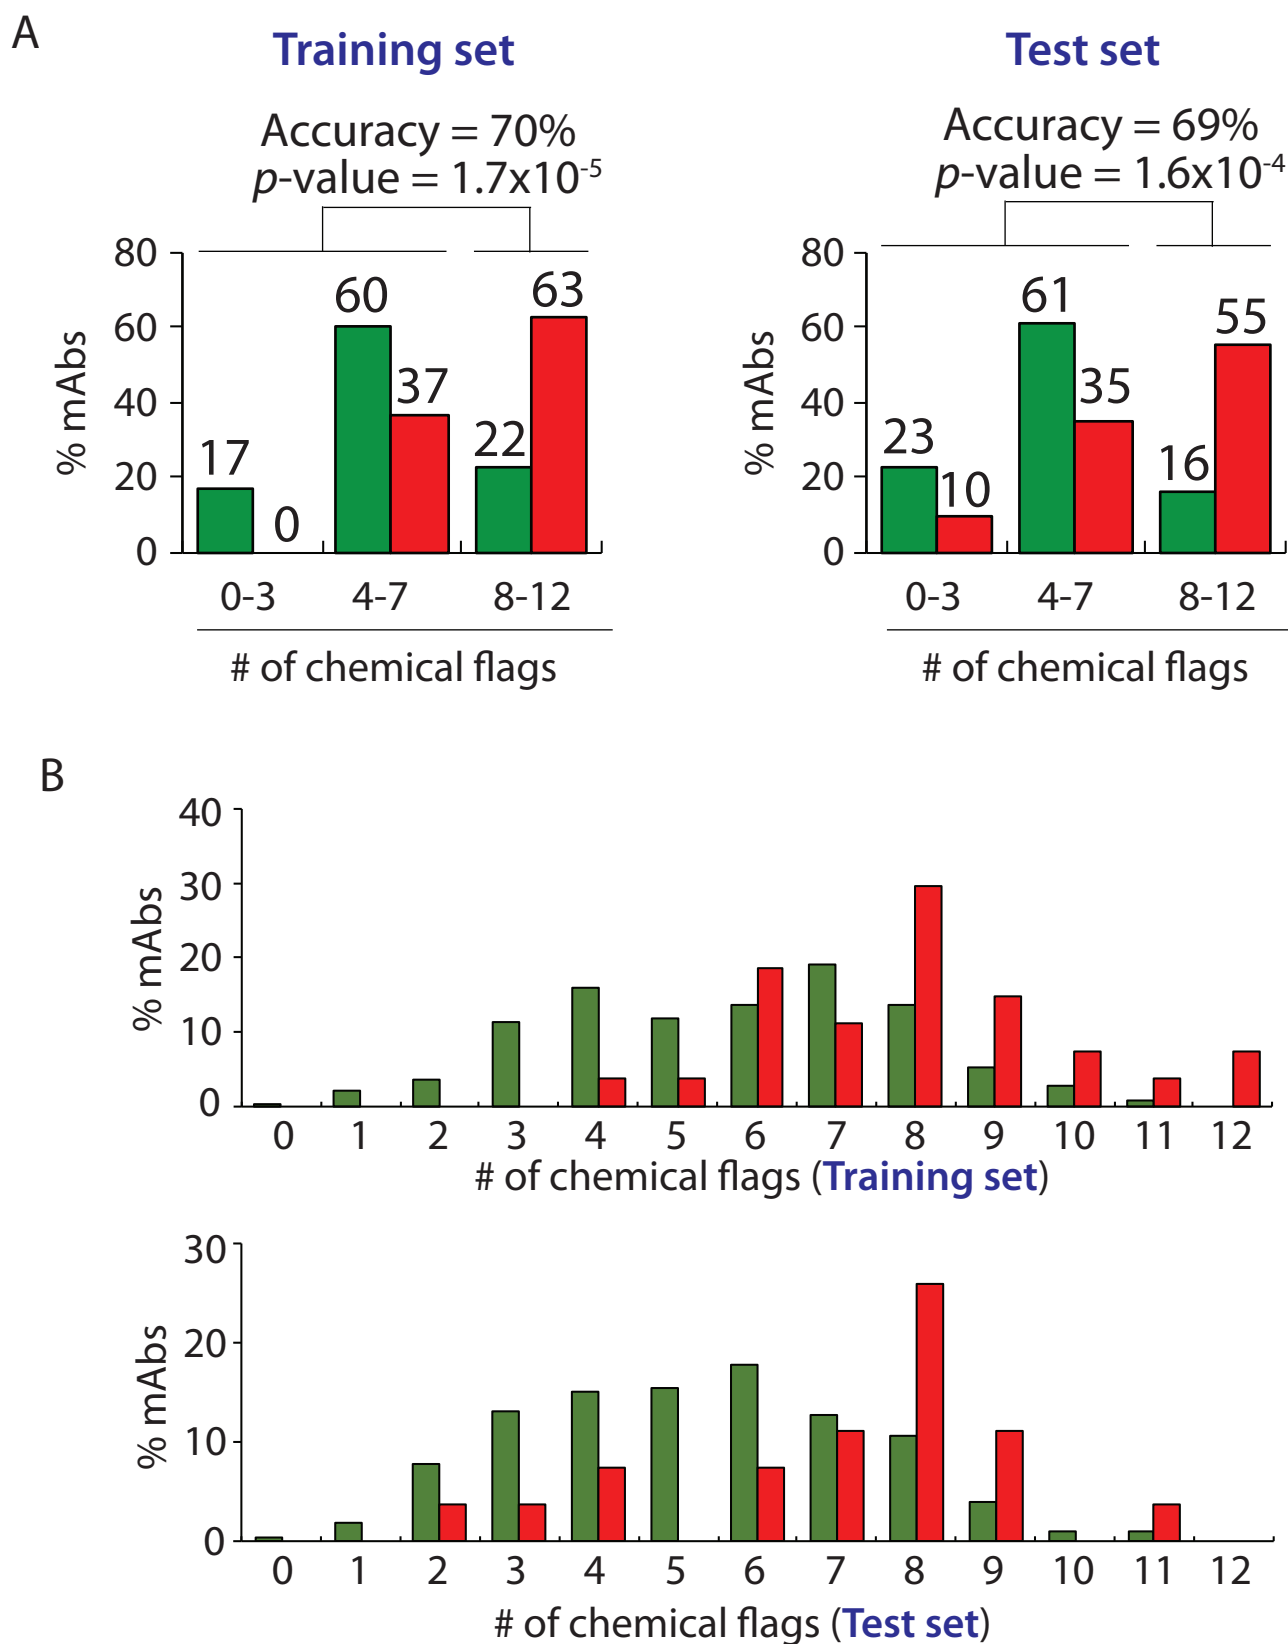

**Figure S7.** Combined chemical rules selectively flag preclinical mAbs with high levels of non-specific interactions. Antibodies with predicted high specificity (as described in Fig. 4) display reduced levels of non-specific binding to a poly-specificity reagent (PSR). (A) The selectivity of the combined chemical rules is similar for the training and test sets of preclinical antibodies. (B) Distributions of the number of flags for the training and test sets of antibodies with low and high specificity. The  $p$ -value was calculated using a 2x2 contingency table (Fisher's exact test).
